# Supplementary material for: Synthesis of novel alkynyl imidazopyridinyl selenides: copper-catalyzed tandem selenation of selenium with 2-arylimidazo[1,2-a]pyridines and terminal alkynes
Source: publisher site journal article supplement (doi:10.3762/bjoc.18.87), 2022-07-19

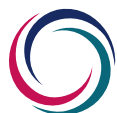

## Supporting Information

for

### **Synthesis of novel alkynyl imidazopyridinyl selenides: copper-catalyzed tandem selenation of selenium with 2-arylimidazo[1,2-a]pyridines and terminal alkynes**

Mio Matsumura, Kaho Tsukada, Kiwa Sugimoto, Yuki Murata and Shuji Yasuike

*Beilstein J. Org. Chem.* **2022**, *18*, 863–871. [doi:10.3762/bjoc.18.87](https://doi.org/10.3762/bjoc.18.87)

**Characterization data of all new compounds, synthetic  
procedures for compounds 6–8, X-ray crystallography details,  
and copies of spectra**

## Table of contents

|                                                        |     |
|--------------------------------------------------------|-----|
| 1. General information.....                            | S2  |
| 2. Experimental details and characterization data..... | S2  |
| 3. Single crystal X-ray diffraction experiment .....   | S11 |
| 4. References .....                                    | S12 |
| 5. NMR spectra of novel compounds .....                | S13 |

## 1. General information

Melting points were taken on a Yanagimoto micro melting point hot-stage apparatus (MP-S3) and are not corrected.  $^1\text{H}$  NMR (400 MHz, TMS:  $\delta$  = 0.00 ppm as an internal standard),  $^{13}\text{C}$  NMR (100 MHz,  $\text{CDCl}_3$ :  $\delta$  = 77.00 or benzene- $d_6$ :  $\delta$  = 128.06 ppm as an internal standard),  $^{19}\text{F}$  NMR (376 MHz, benzotrifluoride;  $\delta$  = -64.0 ppm as an external standard) and  $^{77}\text{Se}$  NMR (76 MHz, diphenyldiselenide;  $\delta$  = 463.15 ppm as an external standard) spectra were recorded on JEOL ECZ-400S spectrometer (JEOL Ltd., Tokyo, Japan) in  $\text{CDCl}_3$  or benzene- $d_6$ . GC-MS (EI) spectra were recorded on an Agilent 5977E Diff-SST MSD-230V spectrometer (Agilent Technologies Japan, Ltd., Tokyo, Japan). ESI mass spectra were measured on an Agilent Technologies 6230 LC/TOF mass spectrometer (Agilent Technologies Japan, Ltd., Tokyo, Japan). IR spectra were recorded on a SHIMADZU FTIR-8400S spectrometer (SHIMADZU CORPORATION, Kyoto, Japan) and are reported in frequency of absorption ( $\text{cm}^{-1}$ ). Only selected IR peaks are reported. The X-ray diffraction measurements were carried out using an XtaLAB Synergy, Single source at home/near, HyPix3000 diffractometer (Rigaku, Tokyo, Japan). All chromatographic separations were accomplished with Silica Gel 60N (Kanto Chemical Co., Inc., Tokyo, Japan). Thin-layer chromatography (TLC) was performed with Macherey-Nagel precoated TLC plates Sil G25 UV<sub>254</sub>. Most of the reagents were used without further purification unless otherwise specified.

Various imidazo[1,2-*a*]pyridine derivatives (**1a–m**) were prepared according to the reported procedures [1]. The spectroscopic data of known selanylimidazo[1,2-*a*]pyridines **5a** [1], **5b** [2], and **6** [3] are in accordance with the literature.

## 2. Experimental details and characterization data

### Preparation and characterization of alkynyl imidazopyridinyl selenides

**Compounds 4aa–ma** were prepared following the general procedure provided in the Experimental.

#### 2-Phenyl-3-[(2-phenylethynyl)selanyl]imidazo[1,2-*a*]pyridine (**4aa**)

Colorless prisms (275 mg, 74%), m.p. 84–86°C ( $\text{CH}_2\text{Cl}_2$ /hexane/ $\text{Et}_2\text{O}$ ).  $^1\text{H}$ -NMR (400 MHz,  $\text{CDCl}_3$ )  $\delta$  (ppm): 8.58 (d,  $J$  = 6.7 Hz, 1H), 8.13 (dt,  $J$  = 8.2, 1.4 Hz, 2H), 7.75 (d,  $J$  = 8.7 Hz, 1H), 7.52 (t,  $J$  = 8.2 Hz, 2H), 7.43 (tt,  $J$  = 7.2, 1.2 Hz, 1H), 7.39–7.34 (m, 3H), 7.29–7.23 (m, 3H), 7.02 (td,  $J$  = 6.9, 1.4 Hz, 1H).  $^{13}\text{C}$ -NMR (100 MHz,  $\text{CDCl}_3$ )  $\delta$  (ppm): 150.2 (C), 147.3 (C), 133.2 (C), 131.7 (CH), 129.1 (CH), 128.7 (CH), 128.6 (CH), 128.4 (CH), 128.2 (CH),

126.7 (CH), 125.9 (CH), 122.5 (C), 117.5 (CH), 113.3 (CH), 100.1 (C), 97.4 (C), 67.5 (C).  $^{77}\text{Se}$ -NMR (76 MHz,  $\text{CDCl}_3$ )  $\delta$  (ppm): 119.5 (s). FTIR (KBr): 2149 ( $\text{C}\equiv\text{N}$ )  $\text{cm}^{-1}$ . HRMS:  $m/z$   $[\text{M}+\text{H}]^+$  calculated for  $\text{C}_{21}\text{H}_{15}\text{N}_2\text{Se}$ : 375.0400. found: 375.0411.

3-([2-(4-Methoxyphenyl)ethynyl]selanyl)-2-phenylimidazo[1,2-*a*]pyridine (**4ab**)

Colorless needle (231 mg, 57%), m.p. 120–122°C ( $\text{CH}_2\text{Cl}_2$ /hexane).  $^1\text{H}$ -NMR (400 MHz,  $\text{CDCl}_3$ )  $\delta$  (ppm): 8.58 (dd,  $J = 6.9, 0.9$  Hz, 1H), 8.13 (d,  $J = 7.3$  Hz, 2H), 7.72 (d,  $J = 9.2$  Hz, 1H), 7.52 (td,  $J = 7.3, 1.8$  Hz, 2H), 7.43 (tt,  $J = 6.8, 1.3$  Hz, 1H), 7.38–7.26 (m, 3H), 7.01 (t,  $J = 6.9$  Hz, 1H), 6.78 (dt,  $J = 8.7, 1.8$  Hz, 2H), 3.77 (s, 3H).  $^{13}\text{C}$ -NMR (100 MHz,  $\text{CDCl}_3$ )  $\delta$  (ppm): 159.9 (C), 150.1 (C), 147.3 (C), 133.5 (CH), 133.3 (C), 129.1 (CH), 128.5 (CH), 128.4 (CH), 126.6 (CH), 126.0 (CH), 117.5 (CH), 114.6 (C), 113.9 (CH), 113.2 (CH), 100.4 (C), 97.4 (C), 65.7 (C), 55.2 ( $\text{CH}_3$ ).  $^{77}\text{Se}$ -NMR (76 MHz,  $\text{CDCl}_3$ )  $\delta$  (ppm): 117.4 (s). FTIR (KBr): 2160 ( $\text{C}\equiv\text{N}$ )  $\text{cm}^{-1}$ . HRMS:  $m/z$   $[\text{M}+\text{H}]^+$  calculated for  $\text{C}_{22}\text{H}_{17}\text{N}_2\text{OSe}$ : 405.0502. found: 405.0494.

3-([2-(4-Methylphenyl)ethynyl]selanyl)-2-phenylimidazo[1,2-*a*]pyridine (**4ac**)

Colorless powder (194 mg, 51%), m.p. 100–101°C ( $\text{CH}_2\text{Cl}_2$ /hexane).  $^1\text{H}$ -NMR (400 MHz,  $\text{CDCl}_3$ )  $\delta$  (ppm): 8.59 (dd,  $J = 6.0, 0.9$  Hz, 1H), 8.15 (d,  $J = 4.9$  Hz, 2H), 7.75 (d,  $J = 8.9$  Hz, 1H), 7.54 (t,  $J = 6.4$  Hz, 2H), 7.44 (td,  $J = 6.4, 1.0$  Hz, 1H), 7.37 (td,  $J = 6.8, 1.4$  Hz, 1H), 7.27 (dd,  $J = 5.9, 2.3$  Hz, 2H), 7.09–7.01 (m, 3H), 2.32 (s, 3H).  $^{13}\text{C}$ -NMR (100 MHz,  $\text{CDCl}_3$ )  $\delta$  (ppm): 150.1 (C), 147.3 (C), 139.0 (C), 133.2 (C), 131.7 (CH), 129.1 (CH), 129.0 (CH), 128.6 (CH), 128.4 (CH), 126.6 (CH), 126.0 (CH), 119.4 (C), 117.5 (CH), 113.2 (CH), 100.3 (C), 97.6 (C), 66.5 (C), 21.5 ( $\text{CH}_3$ ).  $^{77}\text{Se}$ -NMR (76 MHz,  $\text{CDCl}_3$ )  $\delta$  (ppm): 118.3 (s). FTIR (KBr): 2155 ( $\text{C}\equiv\text{N}$ )  $\text{cm}^{-1}$ . HRMS:  $m/z$   $[\text{M}+\text{H}]^+$  calculated for  $\text{C}_{22}\text{H}_{17}\text{N}_2\text{Se}$ : 389.0553. found: 389.0547.

3-([2-(4-Bromophenyl)ethynyl]selanyl)-2-phenylimidazo[1,2-*a*]pyridine (**4ad**)

Colorless plate (185 mg, 41%), m.p. 150–151°C ( $\text{CH}_2\text{Cl}_2$ /hexane).  $^1\text{H}$ -NMR (400 MHz,  $\text{CDCl}_3$ )  $\delta$  (ppm): 8.54 (d,  $J = 5.9$  Hz, 1H), 8.12 (d,  $J = 7.8$  Hz, 2H), 7.78–7.73 (m, 1H), 7.51 (t,  $J = 7.8$  Hz, 2H), 7.45–7.37 (m, 4H), 7.19 (d,  $J = 7.8$  Hz, 2H), 7.06–7.02 (m, 1H).  $^{13}\text{C}$ -NMR (100 MHz,  $\text{CDCl}_3$ )  $\delta$  (ppm): 150.5 (C), 147.4 (C), 133.3 (CH), 133.1 (C), 131.5 (CH), 129.1 (CH), 128.6 (CH), 128.4 (CH), 126.6 (CH), 125.8 (CH), 123.0 (C), 121.4 (C), 117.6 (CH), 113.5 (C), 113.3 (CH), 99.7 (C), 69.2 (C).  $^{77}\text{Se}$ -NMR (76 MHz,  $\text{CDCl}_3$ )  $\delta$  (ppm): 120.0 (s). FTIR (KBr): 2152 ( $\text{C}\equiv\text{N}$ )  $\text{cm}^{-1}$ . HRMS:  $m/z$   $[\text{M}+\text{H}]^+$  calculated for  $\text{C}_{21}\text{H}_{14}\text{BrN}_2\text{Se}$ : 452.9498. found: 452.9493.

3-[[2-(4-Trifluoromethylphenyl)ethynyl]selanyl]-2-phenylimidazo[1,2-*a*]pyridine (**4ae**)

Colorless needle (213 mg, 48%), m.p. 126–127°C (CH<sub>2</sub>Cl<sub>2</sub>/hexane). <sup>1</sup>H-NMR (400 MHz, CDCl<sub>3</sub>) δ (ppm): 8.55 (d, *J* = 6.9 Hz, 1H), 8.12 (d, *J* = 8.2 Hz, 2H), 7.73 (d, *J* = 9.1 Hz, 1H), 7.54–7.50 (m, 4H), 7.45–7.42 (m, 3H), 7.37 (td, *J* = 6.9, 1.4 Hz, 1H), 7.03 (t, *J* = 6.9 Hz, 1H). <sup>13</sup>C-NMR (100 MHz, CDCl<sub>3</sub>) δ (ppm): 150.8 (C), 147.6 (C), 133.3 (C), 131.8 (CH), 130.1 (q, *J* = 33 Hz, C), 129.1 (CH), 128.4 (CH), 126.6 (CH), 126.3 (C), 125.8 (CH), 125.2 (q, *J* = 3.9 Hz, CH), 123.9 (q, *J* = 273 Hz, C), 117.7 (CH), 113.3 (CH), 99.3 (C), 96.0 (C), 71.3 (C). <sup>19</sup>F-NMR (376 MHz, CDCl<sub>3</sub>) δ (ppm): –64.1 (s). <sup>77</sup>Se-NMR (76 MHz, CDCl<sub>3</sub>) δ (ppm): 121.4 (s). FTIR (KBr): 2554 (C≡N) cm<sup>–1</sup>. HRMS: *m/z* [M+H]<sup>+</sup> calculated for C<sub>22</sub>H<sub>14</sub>F<sub>3</sub>N<sub>2</sub>Se: 443.0270. found: 443.0265.

2-Phenyl-3-[[2-(2-thienyl)ethynyl]selanyl]imidazo[1,2-*a*]pyridine (**4af**)

Yellow plate (232 mg, 61%), m.p. 78–80°C (AcOEt/Et<sub>2</sub>O/hexane). <sup>1</sup>H-NMR (400 MHz, CDCl<sub>3</sub>) δ (ppm): 8.55 (dt, *J* = 6.9 Hz, 1H), 8.13 (d, *J* = 7.3 Hz, 2H), 7.70 (d, *J* = 9.1 Hz, 1H), 7.51 (t, *J* = 6.0 Hz, 2H), 7.43 (d, *J* = 6.9 Hz, 1H), 7.40 (dd, *J* = 3.1, 1.0 Hz, 1H), 7.33 (ddd, *J* = 9.1, 6.9, 1.4 Hz, 1H), 7.19 (dd, *J* = 5.1, 3.1 Hz, 1H), 7.03 (dd, *J* = 5.0, 1.1 Hz, 1H), 6.99 (td, *J* = 6.7, 1.1 Hz, 1H). <sup>13</sup>C-NMR (100 MHz, CDCl<sub>3</sub>) δ (ppm): 150.5 (C), 147.4 (C), 133.4 (C), 130.0 (CH), 129.8 (CH), 129.0 (CH), 128.5 (CH), 128.3 (CH), 126.4 (CH), 125.9 (CH), 125.3 (CH), 121.6 (C), 117.6 (CH), 113.1 (CH), 99.9 (C), 92.2 (C), 67.3 (C). <sup>77</sup>Se-NMR (76 MHz, CDCl<sub>3</sub>) δ (ppm): 117.9 (s). FTIR (KBr): 2153 (C≡N) cm<sup>–1</sup>. HRMS: *m/z* [M+H]<sup>+</sup> calculated for C<sub>19</sub>H<sub>13</sub>N<sub>2</sub>SSe: 380.9959. found: 380.9965.

3-[[2-(1-Cyclohexenyl)ethynyl]selanyl]-2-phenylimidazo[1,2-*a*]pyridine (**4ag**)

Colorless needle (269 mg, 71%), m.p. 93–94°C (CH<sub>2</sub>Cl<sub>2</sub>/hexane). <sup>1</sup>H-NMR (400 MHz, CDCl<sub>3</sub>) δ (ppm): 8.51 (dd, *J* = 5.9, 1.0 Hz, 1H), 8.10 (d, *J* = 8.2 Hz, 2H), 7.69 (dd, *J* = 8.2, 1.0 Hz, 1H), 7.50 (t, *J* = 7.8 Hz, 2H), 7.41 (td, *J* = 7.4, 0.9 Hz, 1H), 7.34 (t, *J* = 7.7 Hz, 1H), 6.99 (t, *J* = 6.8 Hz, 1H), 6.10–6.03 (m, 1H), 2.05–2.03 (m, 4H), 1.60–1.49 (m, 4H). <sup>13</sup>C-NMR (100 MHz, CDCl<sub>3</sub>) δ (ppm): 150.2 (C), 147.4 (C), 136.7 (CH), 133.5 (C), 129.1 (CH), 128.4 (CH), 128.3 (CH), 126.3 (CH), 126.0 (CH), 120.4 (C), 117.5 (CH), 112.9 (CH), 100.5 (C), 99.3 (C), 64.1 (C), 28.9 (CH<sub>2</sub>), 25.6 (CH<sub>2</sub>), 22.1 (CH<sub>2</sub>), 21.2 (CH<sub>2</sub>). <sup>77</sup>Se-NMR (76 MHz, CDCl<sub>3</sub>) δ (ppm): 115.9 (s). FTIR (KBr): 2147 (C≡N) cm<sup>–1</sup>. HRMS: *m/z* [M+H]<sup>+</sup> calculated for C<sub>21</sub>H<sub>19</sub>N<sub>2</sub>Se: 379.0700. found: 379.0411.

### 3-(1-Hexyn-1-ylselanyl)-2-phenylimidazo[1,2-*a*]pyridine (**4ah**)

Pale yellow oil (111 mg, 31%). <sup>1</sup>H-NMR (400 MHz, CDCl<sub>3</sub>) δ (ppm): 8.50 (d, *J* = 6.9 Hz, 1H), 8.10 (dd, *J* = 7.4, 1.0 Hz, 2H), 7.70 (d, *J* = 9.1 Hz, 1H), 7.49 (t, *J* = 7.4 Hz, 2H), 7.41 (t, *J* = 6.9 Hz, 1H), 7.34 (t, *J* = 7.4 Hz, 1H), 6.98 (t, *J* = 6.9 Hz, 1H), 2.25 (t, *J* = 6.9 Hz, 2H), 1.43 (qui, *J* = 6.9 Hz, 2H), 1.32 (six, *J* = 6.9 Hz, 2H), 0.85 (t, *J* = 7.0 Hz, 3H). <sup>13</sup>C-NMR (100 MHz, CDCl<sub>3</sub>) δ (ppm): 150.1 (C), 147.3 (C), 133.6 (C), 129.0 (CH), 128.4 (CH), 128.3 (CH), 126.2 (CH), 126.0 (CH), 117.5 (CH), 112.8 (CH), 100.8 (C), 98.9 (C), 56.2 (C), 30.4 (CH<sub>2</sub>), 21.8 (CH<sub>2</sub>), 19.8 (CH<sub>2</sub>), 13.5 (CH<sub>3</sub>). <sup>77</sup>Se-NMR (76 MHz, CDCl<sub>3</sub>) δ (ppm): 111.2 (s). FTIR (neat): 2180 (C≡N) cm<sup>-1</sup>. HRMS: *m/z* [M+H]<sup>+</sup> calculated for C<sub>19</sub>H<sub>19</sub>N<sub>2</sub>Se: 355.0709. found: 355.0713.

### 6-Methoxy-2-phenyl-3-[(2-phenylethynyl)selanyl]imidazo[1,2-*a*]pyridine (**4ba**)

Colorless powder (279 mg, 69%), m.p. 118–120°C (CH<sub>2</sub>Cl<sub>2</sub>/hexane). <sup>1</sup>H-NMR (400 MHz, CDCl<sub>3</sub>) δ (ppm): 8.12–8.08 (m, 3H), 7.65 (d, *J* = 9.6 Hz, 1H), 7.51 (t, *J* = 6.0 Hz, 2H), 7.48–7.32 (m, 3H), 7.31–7.25 (m, 3H), 7.16 (dd, *J* = 9.6, 2.3 Hz, 1H), 3.93 (s, 3H). <sup>13</sup>C-NMR (100 MHz, CDCl<sub>3</sub>) δ (ppm): 149.9 (C), 144.0 (C), 133.2 (C), 131.9 (C), 131.7 (CH), 128.9 (CH), 128.7 (CH), 128.5 (CH), 128.4 (CH), 128.3 (CH), 122.5 (C), 121.7 (CH), 117.6 (CH), 107.8 (CH), 100.8 (C), 97.6 (C), 67.3 (C), 56.3 (CH<sub>3</sub>). <sup>77</sup>Se-NMR (76 MHz, CDCl<sub>3</sub>) δ (ppm): 122.8 (s). FTIR (KBr): 2155 (C≡N) cm<sup>-1</sup>. HRMS: *m/z* [M+H]<sup>+</sup> calculated for C<sub>22</sub>H<sub>17</sub>N<sub>2</sub>OSe: 405.0502. found: 405.0490.

### 6-Methyl-2-phenyl-3-[(2-phenylethynyl)selanyl]imidazo[1,2-*a*]pyridine (**4ca**)

Colorless needle (225 mg, 58%), m.p. 137–138°C (CH<sub>2</sub>Cl<sub>2</sub>/hexane). <sup>1</sup>H-NMR (400 MHz, CDCl<sub>3</sub>) δ (ppm): 8.35 (s, 1H), 8.13 (d, *J* = 7.8 Hz, 2H), 7.64 (d, *J* = 9.1 Hz, 1H), 7.51 (t, *J* = 7.3 Hz, 2H), 7.48–7.20 (m, 7H), 2.44 (s, 3H). <sup>13</sup>C-NMR (100 MHz, CDCl<sub>3</sub>) δ (ppm): 150.0 (C), 146.3 (C), 133.3 (C), 131.7 (CH), 129.8 (CH), 129.0 (CH), 128.6 (CH), 128.5 (CH), 128.4 (CH), 128.2 (CH), 123.7 (CH), 123.1 (C), 122.5 (C), 116.8 (CH), 99.6 (C), 97.2 (C), 68.0 (C), 18.5 (CH<sub>3</sub>). <sup>77</sup>Se-NMR (76 MHz, CDCl<sub>3</sub>) δ (ppm): 118.7 (s). FTIR (KBr): 2153 (C≡N) cm<sup>-1</sup>. HRMS: *m/z* [M+H]<sup>+</sup> calculated for C<sub>22</sub>H<sub>17</sub>N<sub>2</sub>Se: 389.0553. found: 389.0542.

### 6-Fluoro-2-phenyl-3-[(2-phenylethynyl)selanyl]imidazo[1,2-*a*]pyridine (**4da**)

Colorless needle (302 mg, 77%), m.p. 105–107°C (CH<sub>2</sub>Cl<sub>2</sub>/hexane). <sup>1</sup>H-NMR (400 MHz, CDCl<sub>3</sub>) δ (ppm): 8.54–8.52 (m, 1H), 8.14–8.11 (m, 2H), 7.73 (dd, *J* = 9.6, 5.0 Hz, 1H), 7.53 (td, *J* = 7.8, 2.3 Hz, 2H), 7.45 (t, *J* = 5.0 Hz, 1H), 7.43–7.33 (m, 2H), 7.31–7.26 (m, 4H). <sup>13</sup>C-NMR (100 MHz, CDCl<sub>3</sub>) δ (ppm): 153.7 (d, *J* = 239 Hz, C), 151.3 (C), 144.9 (C), 133.0 (C), 131.8 (C), 128.9 (CH), 128.84 (CH), 128.77 (CH), 128.5 (CH), 128.3 (CH), 122.3 (CH),

118.5 (d,  $J = 25$  Hz, CH), 118.0 (d,  $J = 8.7$  Hz, CH), 112.9 (d,  $J = 41$  Hz, CH), 101.6 (C), 97.9 (C), 66.8 (C).  $^{19}\text{F}$ -NMR (376 MHz,  $\text{CDCl}_3$ )  $\delta$  (ppm):  $-139.0$  (s).  $^{77}\text{Se}$ -NMR (76 MHz,  $\text{CDCl}_3$ )  $\delta$  (ppm): 124.1 (s). FTIR (KBr): 2154 ( $\text{C}\equiv\text{N}$ )  $\text{cm}^{-1}$ . HRMS:  $m/z$   $[\text{M}+\text{H}]^+$  calculated for  $\text{C}_{21}\text{H}_{14}\text{FN}_2\text{Se}$ : 393.0302. found: 393.0292.

6-Bromo-2-phenyl-3-[(2-phenylethynyl)selanyl]imidazo[1,2-*a*]pyridine (**4ea**)

Colorless needle (187 mg, 41%), m.p. 147–149°C ( $\text{CH}_2\text{Cl}_2$ /hexane).  $^1\text{H}$ -NMR (400 MHz,  $\text{CDCl}_3$ )  $\delta$  (ppm): 8.72 (s, 1H), 8.11 (d,  $J = 6.9$  Hz, 2H), 7.65 (d,  $J = 9.1$  Hz, 1H), 7.53 (td,  $J = 8.2, 1.8$  Hz, 2H), 7.47–7.38 (m, 4H), 7.33–7.26 (m, 3H).  $^{13}\text{C}$ -NMR (100 MHz,  $\text{CDCl}_3$ )  $\delta$  (ppm): 150.5 (C), 145.6 (C), 132.6 (C), 131.9 (CH), 130.3 (CH), 129.0 (CH), 128.94 (CH), 128.91 (CH), 128.5 (CH), 128.3 (CH), 126.2 (CH), 122.2 (C), 118.1 (CH), 108.2 (C), 100.7 (C), 98.1 (C), 66.7 (C).  $^{77}\text{Se}$ -NMR (76 MHz,  $\text{CDCl}_3$ )  $\delta$  (ppm): 124.4 (s). FTIR (KBr): 2156 ( $\text{C}\equiv\text{N}$ )  $\text{cm}^{-1}$ . HRMS:  $m/z$   $[\text{M}+\text{H}]^+$  calculated for  $\text{C}_{21}\text{H}_{14}\text{BrN}_2\text{Se}$ : 452.9498. found: 452.9488.

2-(4-Methoxyphenyl)-3-[(2-phenylethynyl)selanyl]imidazo[1,2-*a*]pyridine (**4ga**)

Colorless needle (274 mg, 68%), m.p. 147–149°C ( $\text{CH}_2\text{Cl}_2$ /hexane).  $^1\text{H}$ -NMR (400 MHz, benzene- $d_6$ )  $\delta$  (ppm): 8.57 (d,  $J = 8.5$  Hz, 2H), 8.12 (d,  $J = 6.9$  Hz, 1H), 7.44 (d,  $J = 8.7$  Hz, 1H), 7.20 (dd,  $J = 7.3, 0.9$  Hz, 2H), 6.94 (d,  $J = 8.5$  Hz, 2H), 6.87–6.79 (m, 3H), 6.59 (t,  $J = 7.8$  Hz, 1H), 6.19 (t,  $J = 6.8$  Hz, 1H), 3.30 (s, 3H).  $^{13}\text{C}$ -NMR (100 MHz, benzene- $d_6$ )  $\delta$  (ppm): 160.6 (C), 151.2 (C), 147.8 (C), 132.0 (CH), 130.9 (CH), 128.6 (CH), 128.5 (CH), 128.3 (CH), 127.2 (C), 125.7 (CH), 123.2 (C), 117.8 (CH), 114.3 (CH), 112.5 (CH), 99.0 (C), 97.4 (C), 69.5 (C), 54.8 ( $\text{CH}_3$ ).  $^{77}\text{Se}$ -NMR (76 MHz, benzene- $d_6$ )  $\delta$  (ppm): 114.5 (s). FTIR (KBr): 2155 ( $\text{C}\equiv\text{N}$ )  $\text{cm}^{-1}$ . HRMS:  $m/z$   $[\text{M}+\text{H}]^+$  calculated for  $\text{C}_{22}\text{H}_{17}\text{N}_2\text{OSe}$ : 405.0502. found: 405.0495.

2-(4-Methylphenyl)-3-[(2-phenylethynyl)selanyl]imidazo[1,2-*a*]pyridine (**4ha**)

Colorless needle (236 mg, 61%), m.p. 111–113°C ( $\text{CH}_2\text{Cl}_2$ /hexane).  $^1\text{H}$ -NMR (400 MHz,  $\text{CDCl}_3$ )  $\delta$  (ppm): 8.57 (dd,  $J = 6.4, 0.9$  Hz, 1H), 8.04 (dd,  $J = 6.4, 1.8$  Hz, 2H), 7.75 (d,  $J = 9.2$  Hz, 1H), 7.39–7.30 (m, 5H), 7.29–7.23 (m, 3H), 7.03 (t,  $J = 6.9$  Hz, 1H), 2.43 (s, 3 H).  $^{13}\text{C}$ -NMR (100 MHz,  $\text{CDCl}_3$ )  $\delta$  (ppm): 150.3 (C), 147.3 (C), 138.8 (C), 131.9 (CH), 130.3 (C), 129.3 (CH), 129.1 (CH), 128.8 (CH), 128.4 (CH), 126.9 (CH), 126.1 (CH), 122.6 (C), 117.5 (CH), 113.4 (CH), 100.0 (C), 97.5 (C), 67.7 (C), 21.5 ( $\text{CH}_3$ ).  $^{77}\text{Se}$ -NMR (76 MHz,  $\text{CDCl}_3$ )  $\delta$  (ppm): 119.0 (s). FTIR (KBr): 2153 ( $\text{C}\equiv\text{N}$ )  $\text{cm}^{-1}$ . HRMS:  $m/z$   $[\text{M}+\text{H}]^+$  calculated for  $\text{C}_{22}\text{H}_{17}\text{N}_2\text{Se}$ : 389.0553. found: 389.0553.

2-(4-Fluorophenyl)-3-[(2-phenylethynyl)selanyl]imidazo[1,2-*a*]pyridine (**4ia**)

Colorless needle (270 mg, 69%), m.p. 126–128°C (CH<sub>2</sub>Cl<sub>2</sub>/hexane). <sup>1</sup>H-NMR (400 MHz, CDCl<sub>3</sub>) δ (ppm): 8.57 (d, *J* = 6.9 Hz, 1H), 8.15–8.11 (m, 2H), 7.72 (d, *J* = 8.7 Hz, 1H), 7.40–7.18 (m, 8H), 7.04 (t, *J* = 6.9 Hz, 1H). <sup>13</sup>C-NMR (100 MHz, CDCl<sub>3</sub>) δ (ppm): 163.1 (d, *J* = 248 Hz, C), 149.4 (C), 147.3 (C), 131.7 (CH), 130.8 (d, *J* = 7.7 Hz, CH), 129.4 (C), 128.7 (CH), 128.3 (CH), 126.8 (CH), 125.9 (CH), 122.4 (C), 117.5 (CH), 115.4 (d, *J* = 21 Hz, CH), 113.4 (CH), 99.9 (C), 97.4 (C), 67.4 (C). <sup>19</sup>F-NMR (376 MHz, CDCl<sub>3</sub>) δ (ppm): –114.2 (s). <sup>77</sup>Se-NMR (76 MHz, CDCl<sub>3</sub>) δ (ppm): 117.6 (s). FTIR (KBr): 2156 (C≡N) cm<sup>–1</sup>. HRMS: *m/z* [M+H]<sup>+</sup> calculated for C<sub>21</sub>H<sub>14</sub>FN<sub>2</sub>Se: 393.0302. found: 393.0296.

2-(4-Chlorophenyl)-3-[(2-phenylethynyl)selanyl]imidazo[1,2-*a*]pyridine (**4ja**)

Colorless needle (270 mg, 66%), m.p. 134–137°C (CH<sub>2</sub>Cl<sub>2</sub>/hexane). <sup>1</sup>H-NMR (400 MHz, CDCl<sub>3</sub>) δ (ppm): 8.57 (d, *J* = 6.9 Hz, 1H), 8.10 (d, *J* = 8.2 Hz, 2H), 7.73 (d, *J* = 8.7 Hz, 1H), 7.48 (d, *J* = 8.2 Hz, 2H), 7.49–7.34 (m, 3H), 7.31–7.24 (m, 3H), 7.04 (t, *J* = 6.9 Hz, 1H). <sup>13</sup>C-NMR (100 MHz, CDCl<sub>3</sub>) δ (ppm): 149.1 (C), 147.3 (C), 134.6 (C), 131.7 (CH), 130.3 (CH), 128.8 (CH), 128.6 (CH), 128.3 (CH), 126.9 (CH), 125.9 (CH), 122.3 (C), 117.5 (CH), 113.4 (CH), 100.2 (C), 97.5 (C), 67.3 (C). <sup>77</sup>Se-NMR (76 MHz, CDCl<sub>3</sub>) δ (ppm): 118.2 (s). FTIR (KBr): 2156 (C≡N) cm<sup>–1</sup>. HRMS: *m/z* [M+H]<sup>+</sup> calculated for C<sub>21</sub>H<sub>14</sub>ClN<sub>2</sub>Se: 409.0004. found: 408.9995.

2-(4-Bromophenyl)-3-[(2-phenylethynyl)selanyl]imidazo[1,2-*a*]pyridine (**4ka**)

Colorless needle (325 mg, 72%), m.p. 144–145°C (CH<sub>2</sub>Cl<sub>2</sub>/hexane). <sup>1</sup>H-NMR (400 MHz, CDCl<sub>3</sub>) δ (ppm): 8.58 (d, *J* = 6.4 Hz, 1H), 8.04 (dt, *J* = 6.9, 2.3 Hz, 2H), 7.76 (t, *J* = 9.1 Hz, 1H), 7.65 (d, *J* = 8.2 Hz, 2H), 7.42–7.24 (m, 6H), 7.06 (t, *J* = 6.9 Hz, 1H). <sup>13</sup>C-NMR (100 MHz, CDCl<sub>3</sub>) δ (ppm): 147.2 (C), 131.9 (C), 131.8 (CH), 131.6 (CH), 131.0 (CH), 130.6 (C), 128.8 (CH), 128.3 (CH), 127.1 (CH), 126.0 (CH), 123.1 (C), 122.3 (C), 117.4 (CH), 113.6 (CH), 100.4 (C), 97.6 (C), 67.1 (C). <sup>77</sup>Se-NMR (76 MHz, CDCl<sub>3</sub>) δ (ppm): 118.6 (s). FTIR (KBr): 2155 (C≡N) cm<sup>–1</sup>. HRMS: *m/z* [M+H]<sup>+</sup> calculated for C<sub>21</sub>H<sub>14</sub>BrN<sub>2</sub>Se: 452.9498. found: 452.9487.

2-(4-Trifluoromethylphenyl)-3-[(2-phenylethynyl)selanyl]imidazo[1,2-*a*]pyridine (**4la**)

Colorless needle (225 mg, 51%), m.p. 123–124°C (CH<sub>2</sub>Cl<sub>2</sub>/hexane). <sup>1</sup>H-NMR (400 MHz, CDCl<sub>3</sub>) δ (ppm): 8.61 (d, *J* = 6.9 Hz, 1H), 8.29 (d, *J* = 8.2 Hz, 2H), 7.79–7.76 (m, 3H), 7.42 (t, *J* = 8.0 Hz, 1H), 7.36 (dd, *J* = 7.4, 1.4 Hz, 2H), 7.31–7.25 (m, 3H), 7.08 (t, *J* = 6.9 Hz, 1H). <sup>13</sup>C-NMR (100 MHz, CDCl<sub>3</sub>) δ (ppm): 148.5 (C), 147.4 (C), 136.7 (C), 131.8 (CH), 130.4 (q, *J* = 34 Hz, C), 129.3 (CH), 128.9 (CH), 128.3 (CH), 127.2 (CH), 126.0 (CH), 125.3 (q, *J*



= 3.9 Hz, CH), 124.2 (q,  $J$  = 273 Hz, C), 122.3 (C), 117.7 (CH), 113.7 (CH), 101.1 (C), 97.7 (C), 67.0 (C).  $^{19}\text{F}$ -NMR (376 MHz,  $\text{CDCl}_3$ )  $\delta$  (ppm): -63.9 (s).  $^{77}\text{Se}$ -NMR (76 MHz,  $\text{CDCl}_3$ )  $\delta$  (ppm): 118.6 (s). FTIR (KBr): 2158 ( $\text{C}\equiv\text{N}$ )  $\text{cm}^{-1}$ . HRMS:  $m/z$   $[\text{M}+\text{H}]^+$  calculated for  $\text{C}_{22}\text{H}_{14}\text{F}_3\text{N}_2\text{Se}$ : 443.0270. found: 443.0257.

#### 2-(2-Methylphenyl)-3-[(2-phenylethynyl)selanyl]imidazo[1,2-*a*]pyridine (**4ma**)

Colorless needle (229 mg, 59%), m.p. 105–107 °C ( $\text{CH}_2\text{Cl}_2$ /hexane).  $^1\text{H}$ -NMR (400 MHz,  $\text{CDCl}_3$ )  $\delta$  (ppm): 8.55 (d,  $J$  = 6.9 Hz, 1H), 7.73 (d,  $J$  = 8.7 Hz, 1H), 7.47 (t,  $J$  = 7.3 Hz, 1H), 7.40–7.26 (m, 9H), 7.04 (t,  $J$  = 6.8 Hz, 1H), 2.41 (s, 3H).  $^{13}\text{C}$ -NMR (100 MHz,  $\text{CDCl}_3$ )  $\delta$  (ppm): 152.0 (C), 147.2 (C), 137.6 (C), 133.0 (C), 131.7 (CH), 131.1 (CH), 130.3 (CH), 128.6 (CH), 128.3 (CH), 126.3 (CH), 125.9 (CH), 125.3 (CH), 122.6 (C), 117.6 (CH), 113.2 (CH), 101.9 (C), 97.3 (C), 67.7 (C), 20.4 ( $\text{CH}_3$ ).  $^{77}\text{Se}$ -NMR (76 MHz,  $\text{CDCl}_3$ )  $\delta$  (ppm): 111.5 (s). FTIR (KBr): 2152 ( $\text{C}\equiv\text{N}$ )  $\text{cm}^{-1}$ . HRMS:  $m/z$   $[\text{M}+\text{H}]^+$  calculated for  $\text{C}_{22}\text{H}_{17}\text{N}_2\text{Se}$ : 389.0553. found: 389.0545.

### Reaction of 3-(ethynylselanyl)imidazo[1,2-*a*]pyridine:

#### Reaction with phenyllithium

A solution of PhLi (1.12 M solution in cyclohexane/diethyl ether, 0.9 mL, 1.0 mmol, 2 equiv) was added dropwise to a solution of **4aa** (187 mg, 0.5 mmol) in dry THF (2 mL) at -78 °C under an Ar atmosphere. After 1 h, the reaction mixture was diluted with  $\text{CH}_2\text{Cl}_2$  (20 mL) and water (20 mL) at 0 °C. The phases were separated, and the aqueous layer was extracted with  $\text{CH}_2\text{Cl}_2$  (10 mL  $\times$  2). The combined organic layer was washed with water (10 mL  $\times$  3), dried over anhydrous magnesium sulfate, filtered, and concentrated under reduced pressure. The residue was purified by column chromatography using hexane/AcOEt as eluent to give 2-phenyl-3-(phenylselanyl)imidazo[1,2-*a*]pyridine (**6a**) [1] as a yellow oil (85 mg, 49%).  $^1\text{H}$ -NMR (400 MHz,  $\text{CDCl}_3$ )  $\delta$  (ppm): 8.36 (dt,  $J$  = 6.9, 1.4 Hz, 1H), 8.16 (d,  $J$  = 7.3 Hz, 2H), 7.78 (d,  $J$  = 9.1 Hz, 1H), 7.45 (tt,  $J$  = 6.9, 2.3 Hz, 2H), 7.41–7.33 (m, 2H), 7.20–7.16 (m, 3H), 7.13–7.10 (m, 2H), 6.89 (td,  $J$  = 6.9, 0.9 Hz, 1H). LRMS (EI)  $m/z$ : 350.0 ( $[\text{M}]^+$ , 40%), 270.1 (100%). HRMS:  $m/z$   $[\text{M}]^+$  calculated for  $\text{C}_{19}\text{H}_{14}\text{N}_2\text{Se}$ : 350.0322. Found: 350.0319.

#### Reaction with *n*-butyllithium

A solution of *n*-BuLi (1.55 M solution in hexane, 2.0 mL, 3.0 mmol, 6 equiv) was added dropwise to a solution of **4aa** (187 mg, 0.5 mmol) in dry THF (2 mL) at -78 °C under an Ar atmosphere. After 1 h, the reaction mixture was diluted with  $\text{CH}_2\text{Cl}_2$  (20 mL) and water (20 mL) at 0 °C. The phases were separated, and the aqueous layer was

extracted with CH<sub>2</sub>Cl<sub>2</sub> (10 mL × 2). The combined organic layer was washed with water (10 mL × 3), dried over anhydrous magnesium sulfate, filtered, and concentrated under reduced pressure. The residue was purified by column chromatography using hexane/AcOEt as eluent to give 3-(butylselanyl)-2-phenylimidazo[1,2-*a*]pyridine (**6b**) [2] as a yellow oil (104 mg, 63%). <sup>1</sup>H-NMR (400 MHz, CDCl<sub>3</sub>) δ (ppm): 8.56 (d, *J* = 6.9 Hz, 1H), 8.24 (dt, *J* = 8.2, 1.8 Hz, 2H), 7.69 (d, *J* = 9.1 Hz, 1H), 7.47 (td, *J* = 7.3, 1.4 Hz, 2H), 7.38 (tt, *J* = 7.8, 1.8 Hz, 1H), 7.29 (t, *J* = 7.8 Hz, 1H), 6.92 (t, *J* = 6.9 Hz, 1H), 2.68 (t, *J* = 7.8 Hz, 2H), 1.47 (qui, *J* = 7.3 Hz, 2H), 1.29 (six, *J* = 7.8 Hz, 2H), 0.76 (t, *J* = 7.3 Hz, 3H). LRMS (EI) *m/z*: 330.1 ([M]<sup>+</sup>, 30%), 273.0 (100%) 194.1 (99%). HRMS: *m/z* [M]<sup>+</sup> calculated for C<sub>17</sub>H<sub>18</sub>N<sub>2</sub>Se: 330.0635. Found: 330.0639.

#### Reaction with TMSCF<sub>3</sub>

To a solution of **4aa** (187 mg, 0.5 mmol) and cesium carbonate (652 mg, 2.0 mmol, 4 equiv) in dry acetonitrile (4 mL) was added (trifluoromethyl)trimethylsilane (111 μL, 0.75 mmol, 1.5 equiv) at 0 °C. The solution was stirred for 1 h at 0 °C and then warmed to room temperature. After 48 h, the reaction mixture was filtered through a short pad of silica, rinsed with dichloromethane (30 mL) and the collected solution was concentrated under reduced pressure. The residue was purified by column chromatography using hexane/AcOEt as eluent to give 3-(trifluoromethylselanyl)-2-phenylimidazo[1,2-*a*]pyridine (**7**) [3] as a yellow oil (75 mg, 44%). <sup>1</sup>H-NMR (400 MHz, CDCl<sub>3</sub>) δ (ppm): 8.54 (d, *J* = 6.9 Hz, 1H), 8.07 (d, *J* = 6.9 Hz, 2H), 7.73 (d, *J* = 8.8 Hz, 1H), 7.53–7.39 (m, 4H), 7.02 (td, *J* = 6.8, 1.0 Hz, 1H). LRMS (EI) *m/z*: 342.0 ([M]<sup>+</sup>, 30%), 273.0 (100%), 78.0 (30%). HRMS: *m/z* [M]<sup>+</sup> calculated for C<sub>14</sub>H<sub>9</sub>F<sub>3</sub>N<sub>2</sub>Se: 341.9883. Found: 341.9882.

#### Reaction with benzylazide

A solution of **4aa** (187 mg, 0.5 mmol), benzylazide (147 mg, 1.1 mmol, 2.2 equiv) CuI (95 mg, 0.5 mmol, 1 equiv) and *N,N,N',N'',N'''*-pentamethyldiethylenetriamine (87 mg, 0.5 mmol, 1 equiv) in dry THF (2 mL) was heated at 60 °C under an Ar atmosphere. After 5.5 h, the mixture was allowed to cool to room temperature, and diluted with AcOEt (20 mL) and saturated aqueous NH<sub>4</sub>Cl (20 mL) at 0 °C. The phases were separated and the aqueous layer was extracted with AcOEt (10 mL × 2). The combined organic layer was washed with saturated aqueous NH<sub>4</sub>Cl (20 mL × 6), dried over anhydrous magnesium sulfate, filtered, and concentrated under reduced pressure. The residue was purified by column chromatography using hexane/AcOEt as eluent to give 3-[(1-benzyl-4-phenyl)-1*H*-1,2,3-triazolyl]-2-phenylimidazo[1,2-*a*]pyridine (**8**) as colorless prisms (182 mg, 72%). m.p. 118–121 °C (EtOH). <sup>1</sup>H-NMR

(400 MHz, CDCl<sub>3</sub>)  $\delta$  (ppm): 7.92 (dd,  $J$  = 7.8, 1.8 Hz, 2H), 7.87–7.85 (m, 2H), 7.58–7.48 (m, 8H), 7.24–7.14 (m, 4H), 6.64 (d,  $J$  = 6.9 Hz, 2H), 6.44 (td,  $J$  = 6.9, 0.9 Hz, 1H), 5.11 (s, 2H). <sup>13</sup>C-NMR (100 MHz, CDCl<sub>3</sub>)  $\delta$  (ppm): 151.7 (C), 151.2 (C), 147.0 (C), 134.6 (C), 132.9 (C), 130.5 (C), 129.7 (CH), 129.1 (CH), 128.9 (CH), 128.7 (CH), 128.62 (CH), 128.57 (CH), 128.5 (CH), 128.0 (CH), 126.9 (CH), 126.6 (CH), 125.5 (CH), 117.6 (C), 117.3 (CH), 113.1 (CH), 102.1 (C), 52.6 (CH<sub>2</sub>). <sup>77</sup>Se-NMR (76 MHz, CDCl<sub>3</sub>)  $\delta$  (ppm): 46.8 (s). IR (KBr):  $\nu$  = 3422, 3065, 3028, 1460, 1343 cm<sup>-1</sup>. HRMS:  $m/z$  [M]<sup>+</sup> calculated for C<sub>28</sub>H<sub>21</sub>N<sub>5</sub>Se: 507.0962. found: 507.0966.

### 3. Single crystal X-ray diffraction experiment

A suitable crystal was selected and measured on an XtaLAB Synergy, Single source at home/near, HyPix3000 diffractometer (Rigaku, Tokyo, Japan). The crystal was kept at 103 K in the N<sub>2</sub> cold stream during data collection. Using Olex2 [4], the structure was solved with the SHELXT [5] structure solution program using Intrinsic Phasing and refined with the SHELXL [6] refinement package using Least Squares minimization. All non-hydrogen atoms were refined anisotropically. The hydrogen atoms were refined isotropically on the calculated positions using a riding model (AFIX 23 and 43) with  $U_{\text{iso}}$  values constrained to 1.2/1.5  $U_{\text{eq}}$  of their parent atoms.

#### Data of compound **4aa**

The colorless prism crystal ( $0.105 \times 0.096 \times 0.056 \text{ mm}^3$ ), obtained from CH<sub>2</sub>Cl<sub>2</sub>/hexane, was immersed in Paraton-N oil. C<sub>21</sub>H<sub>14</sub>N<sub>2</sub>Se,  $M_r = 373.30$ ; monoclinic, space group  $P2_1/c$ ,  $Z = 4$ ,  $D_{\text{calc}} = 1.506 \text{ g}\cdot\text{cm}^{-3}$ ,  $\mu(\text{Cu K}\alpha) = 3.097 \text{ mm}^{-1}$ ,  $a = 8.60000(10)$ ,  $b = 11.4839(2)$ ,  $c = 16.6687(2) \text{ \AA}$ ,  $\beta = 90.8590(10)^\circ$ ,  $V = 1646.04(4) \text{ \AA}^3$ , 7991 measured and 2989 independent [ $I > 2\sigma(I)$ ] reflections, 217 parameters, final  $R_1 = 0.0274$ ,  $wR_2 = 0.0667$ ,  $S = 1.056$  [ $I > 2\sigma(I)$ ]. CCDC 2156343.

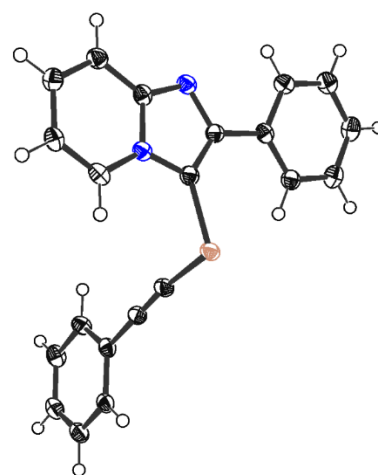

Figure S1. Ortep drawing of **2a** (50% probability)

#### Data of compound **8**

The colorless prism crystal ( $0.296 \times 0.195 \times 0.064 \text{ mm}^3$ ), obtained from EtOH, was immersed in Paraton-N oil. C<sub>28</sub>H<sub>21</sub>N<sub>5</sub>Se,  $M_r = 506.46$ ; triclinic, space group  $P\bar{1}$ ,  $Z = 2$ ,  $D_{\text{calc}} = 1.473 \text{ g}\cdot\text{cm}^{-3}$ ,  $\mu(\text{Cu K}\alpha) = 2.434 \text{ mm}^{-1}$ ,  $a = 9.1538(2)$ ,  $b = 10.0410(3)$ ,  $c = 13.2207(6) \text{ \AA}$ ,  $\alpha = 105.832(3)$ ,  $\beta = 90.8590(10)$ ,  $\gamma = 100.780(2)^\circ$ ,  $V = 1141.77(7) \text{ \AA}^3$ , 9609 measured and 9609 independent [ $I > 2\sigma(I)$ ] reflections, 308 parameters, final  $R_1 = 0.0459$ ,  $wR_2 = 0.1285$ ,  $S = 1.084$  [ $I > 2\sigma(I)$ ]. CCDC 2156344.

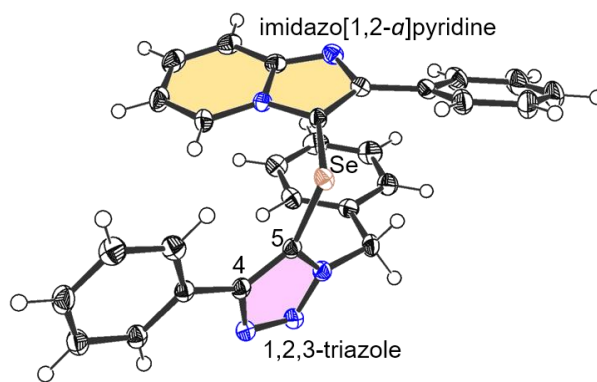

Figure S2. Ortep drawing of **8** (50% probability)

#### 4. References

1. Kondo, K.; Matsumura, M.; Kanasaki, K.; Murata, Y.; Kakusawa, N.; Yasuike, S. *Synthesis* **2018**, *50*, 2200–2210.
2. Vieira, B. M.; Thurow, S.; da Costa, M.; Casaril, A. M.; Domingues, M.; Schumacher, R. F.; Perin, G.; Alves, D.; Savegnago, L.; Lenardão, E. J. *Asian J. Org. Chem.* **2017**, *6*, 1635–1646.
3. Redon, S.; Obah Kosso, A. R.; Broggi, J.; Vanelle, P. *Tetrahedron Lett.* **2017**, *58*, 2771–2773.
4. Dolomanov, O. V.; Bourhis, L. J.; Gildea, R. J.; Howard, J. A. K.; Puschmann, H. *J. Appl. Cryst.* **2009**, *42*, 339–341.
5. Sheldrick, G. M. *Acta Cryst.* **2015**, *A71*, 3–8.
6. Sheldrick, G. M. *Acta Cryst.* **2015**, *C71*, 3–8.

# NMR data of novel compounds

## <sup>1</sup>H NMR of **4aa**

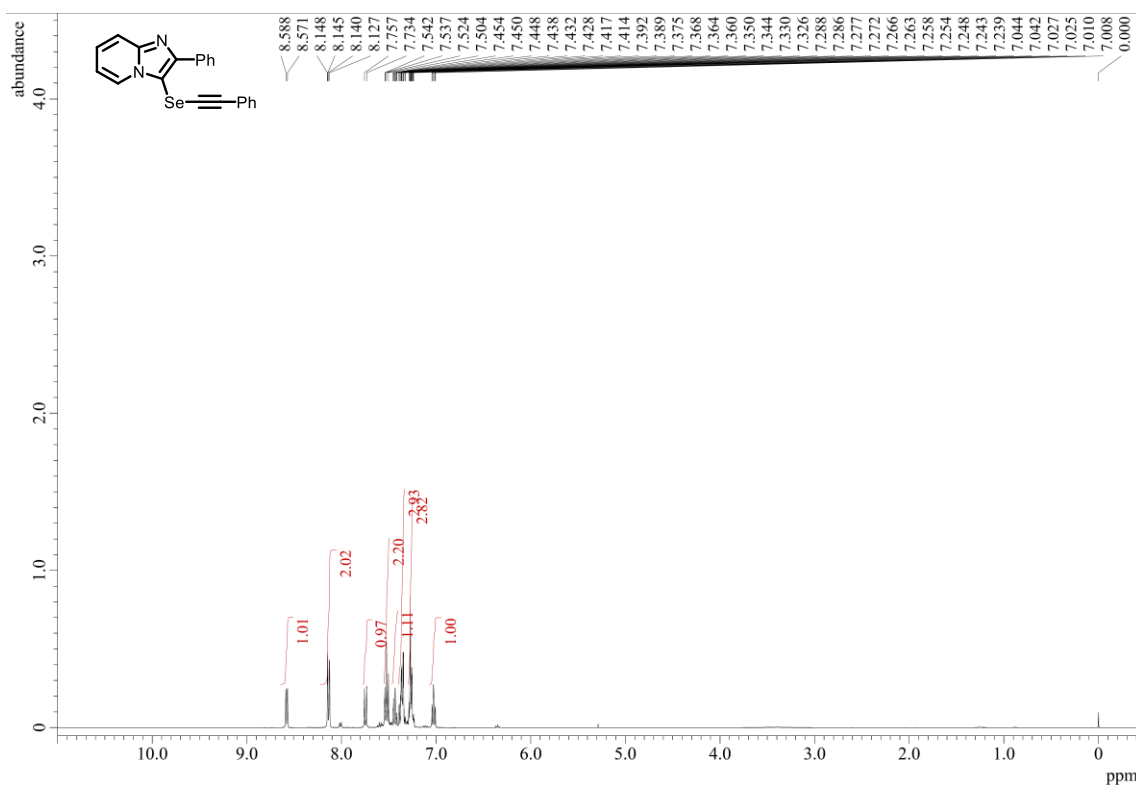

## <sup>13</sup>C NMR of **4aa**

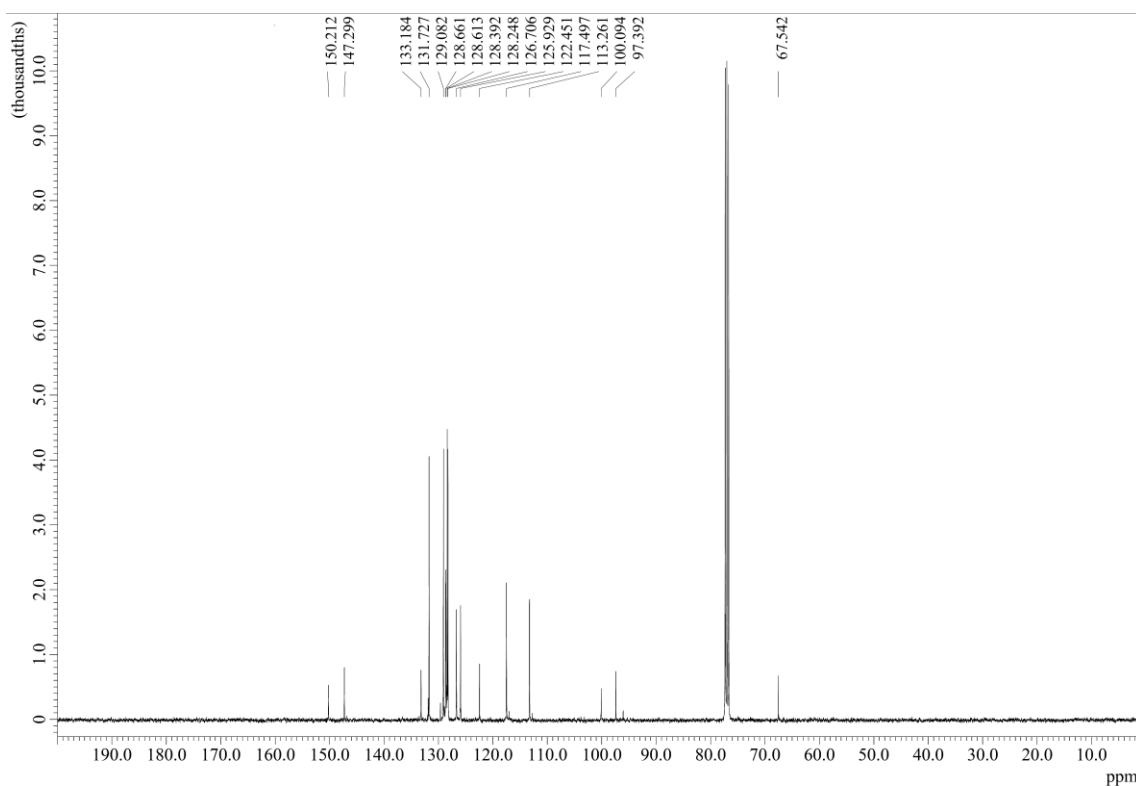

<sup>1</sup>H NMR of **4ab**

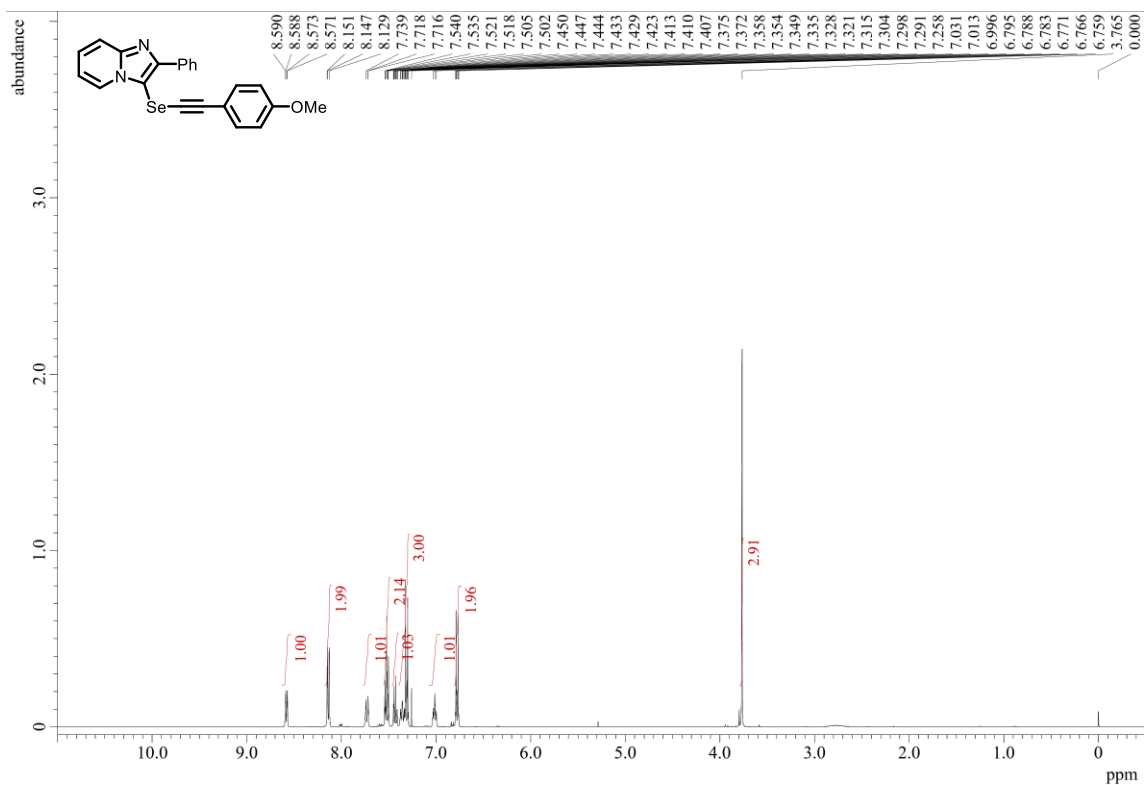

<sup>13</sup>C NMR of **4ab**

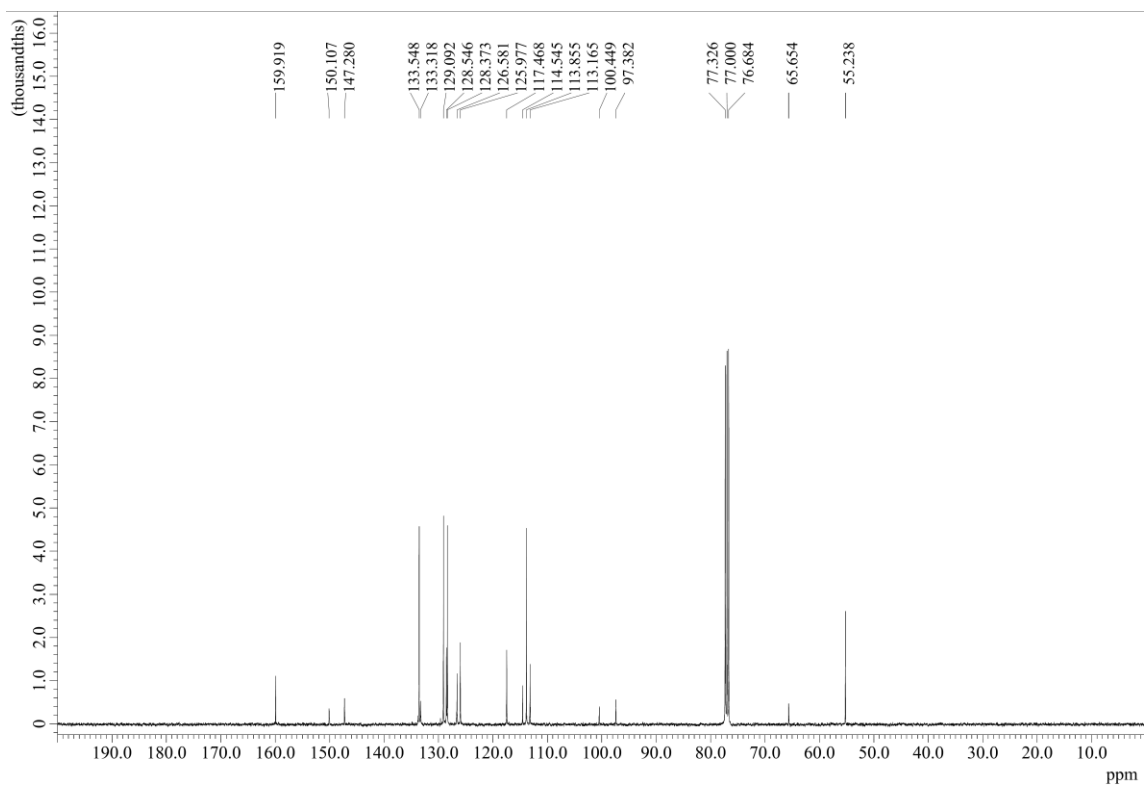

<sup>1</sup>H NMR of **4ac**

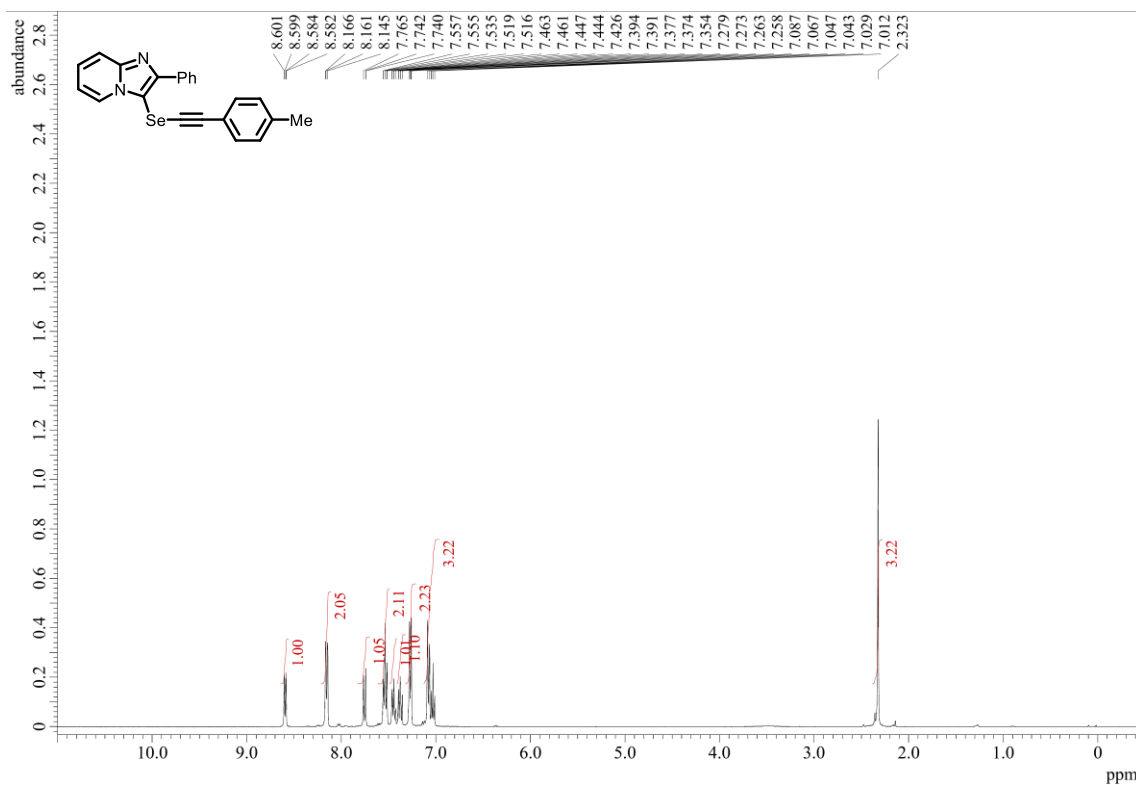

<sup>13</sup>C NMR of **4ac**

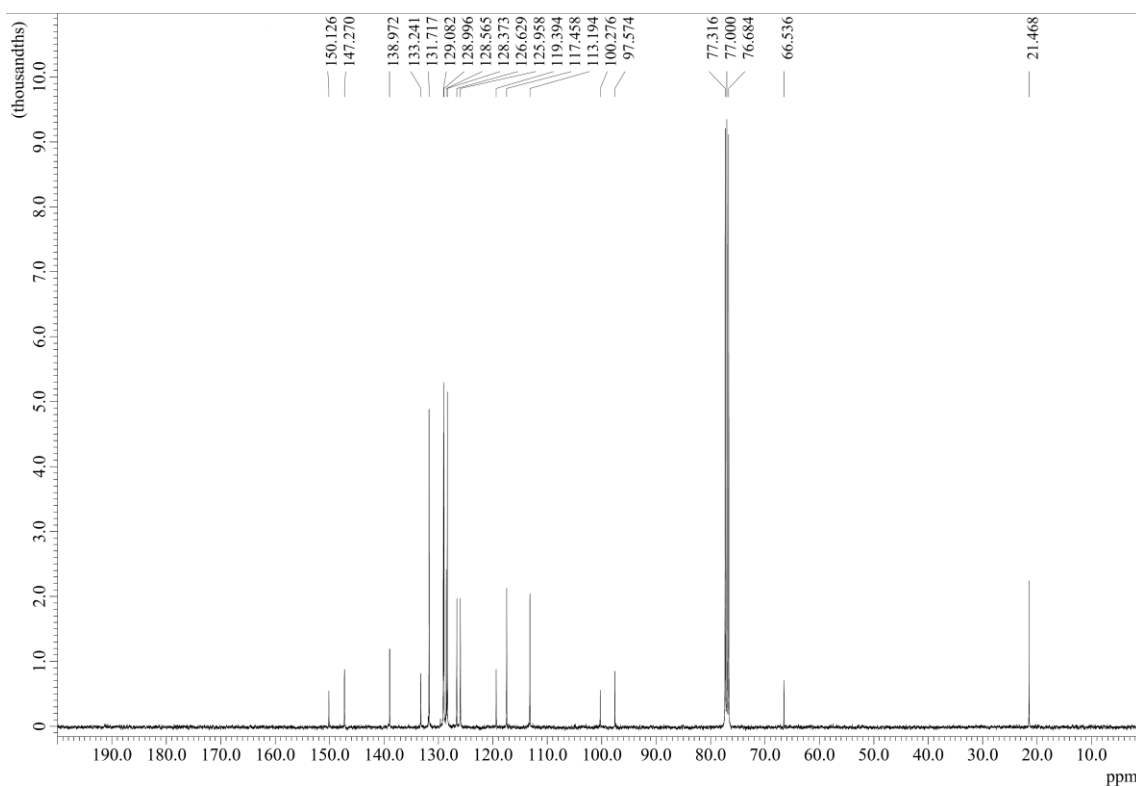



<sup>1</sup>H NMR of **4ad**

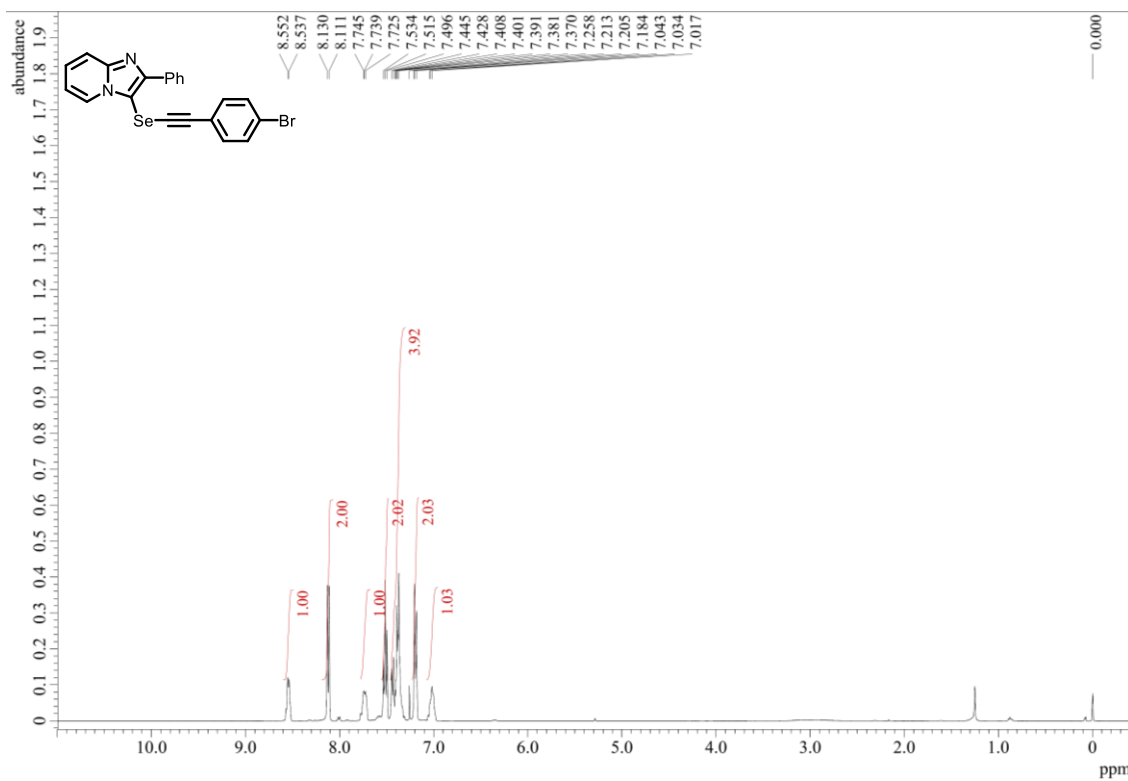

<sup>13</sup>C NMR of **4ad**

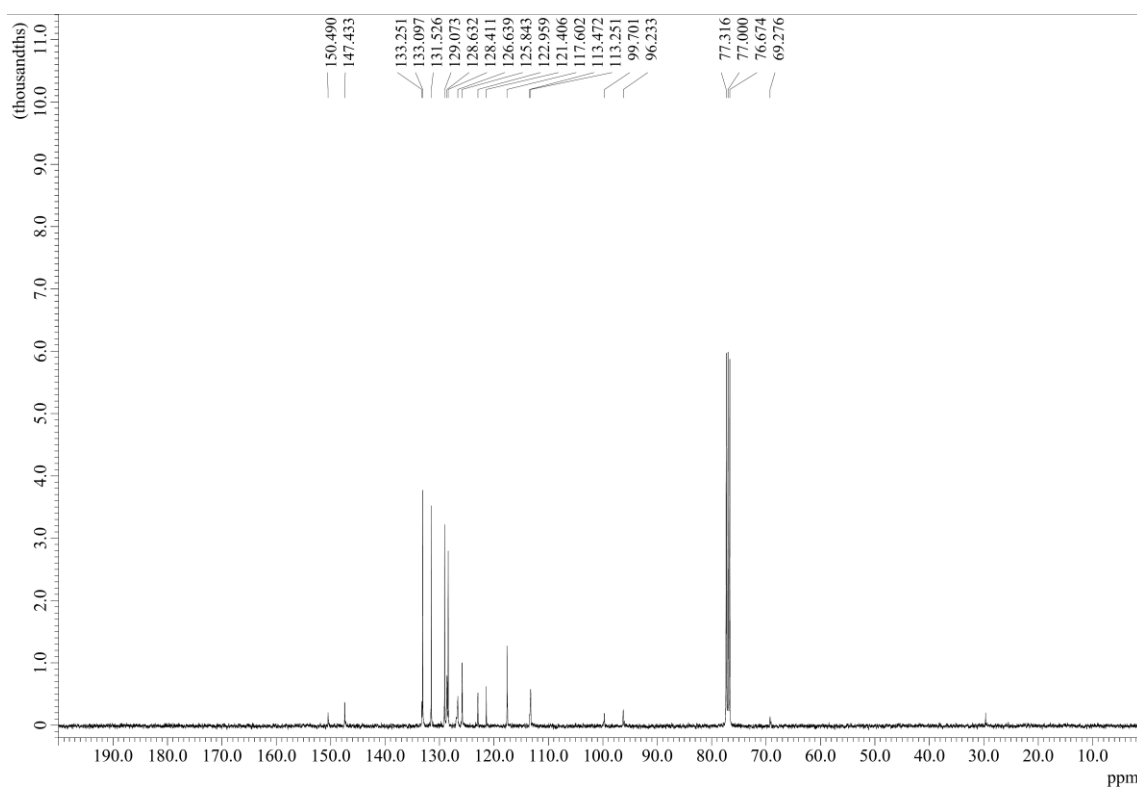

<sup>1</sup>H NMR of **4ae**

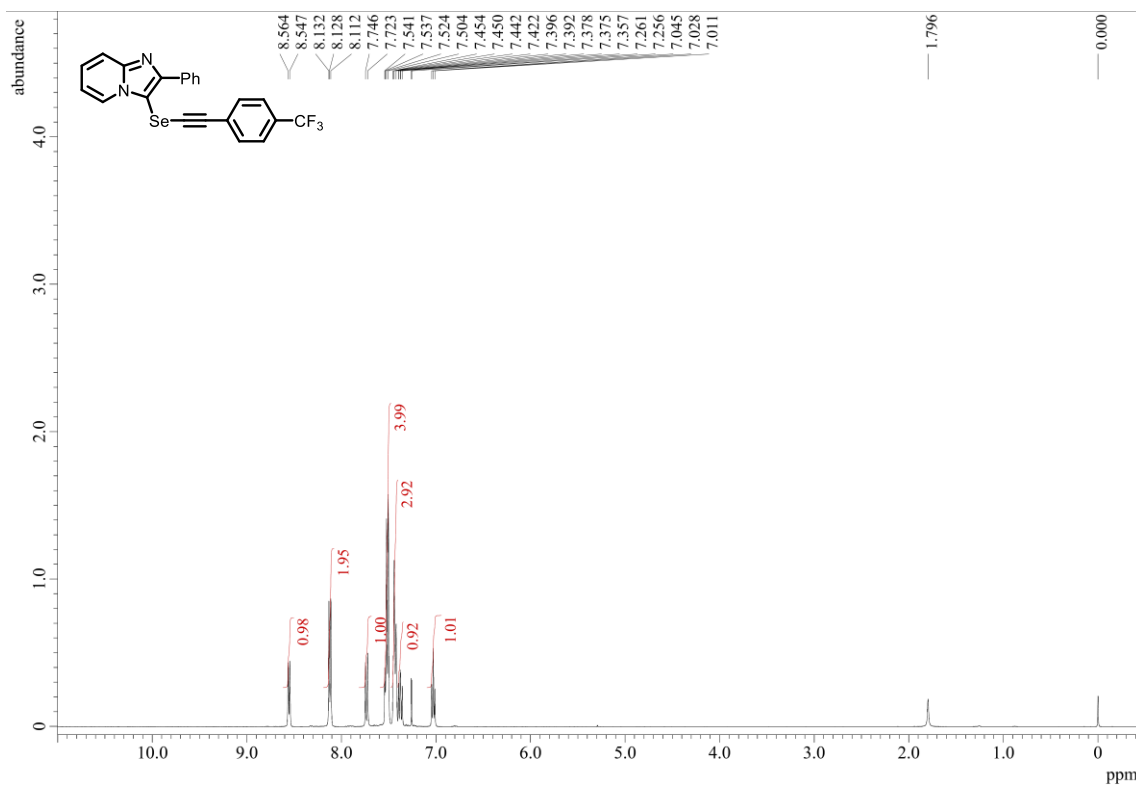

<sup>13</sup>C NMR of **4ea**

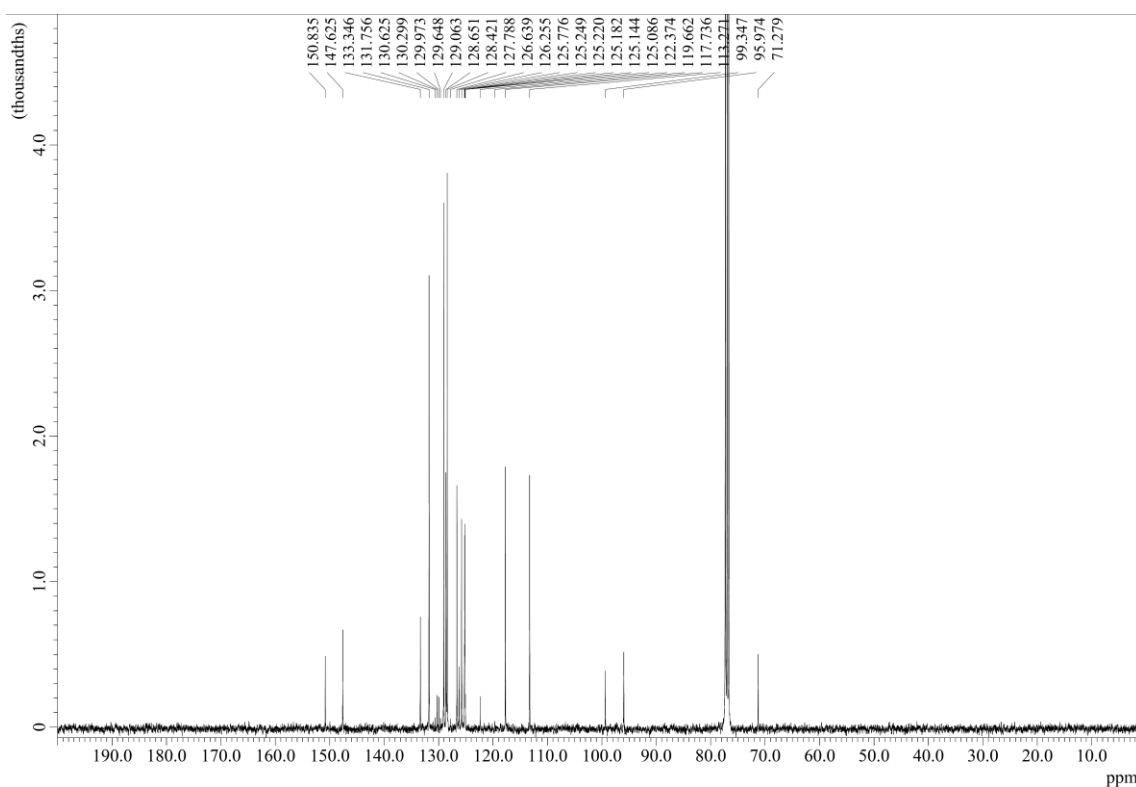

<sup>1</sup>H NMR of **4af**

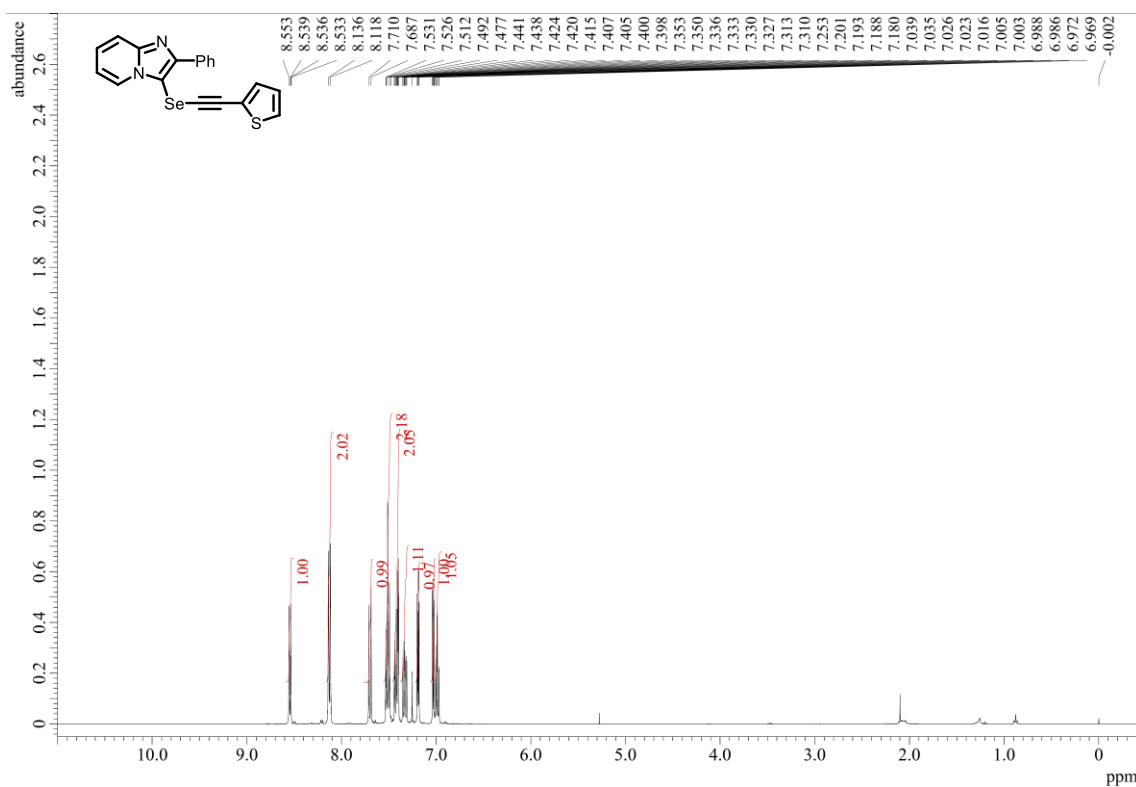

<sup>13</sup>C NMR of **4af**

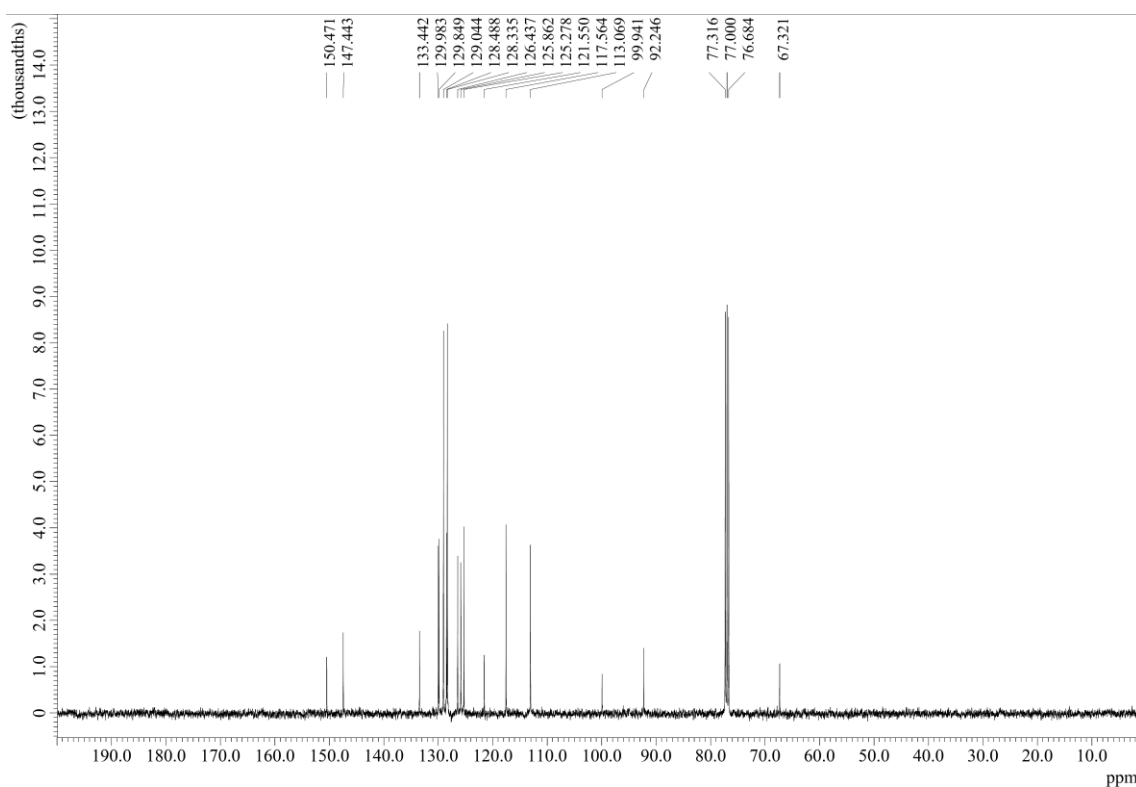

<sup>1</sup>H NMR of **4ag**

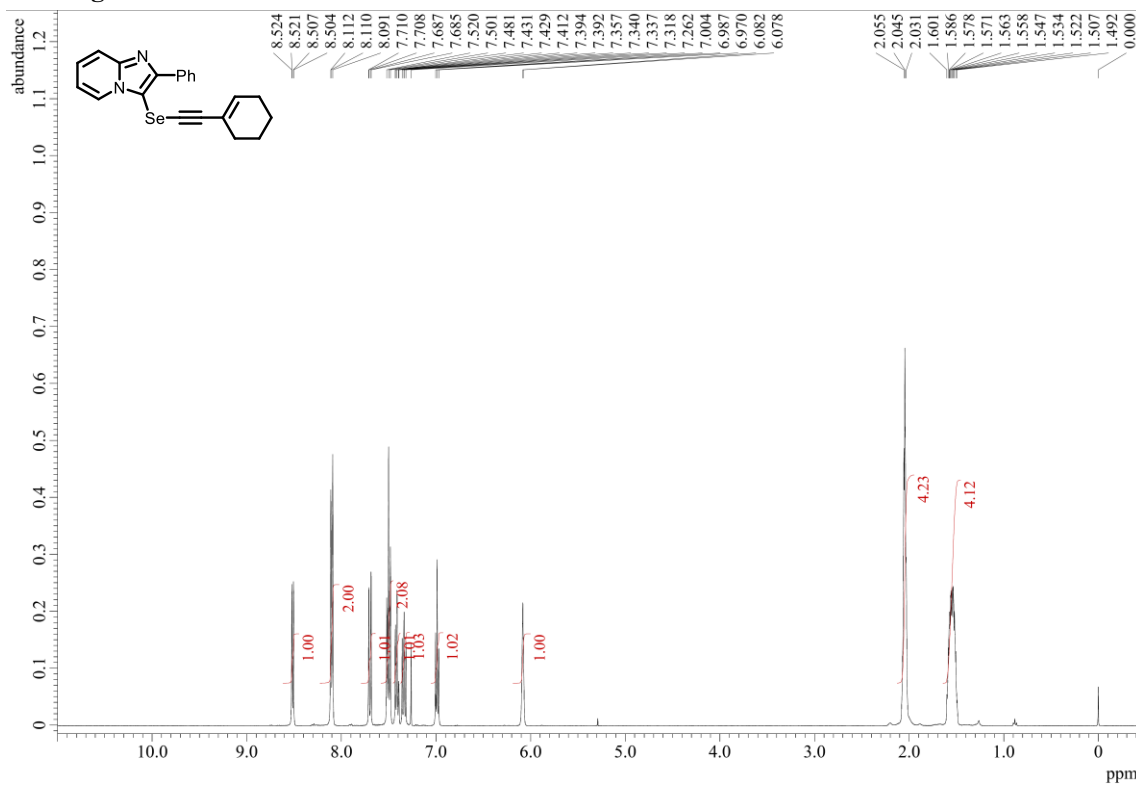

<sup>13</sup>C NMR of **4ag**

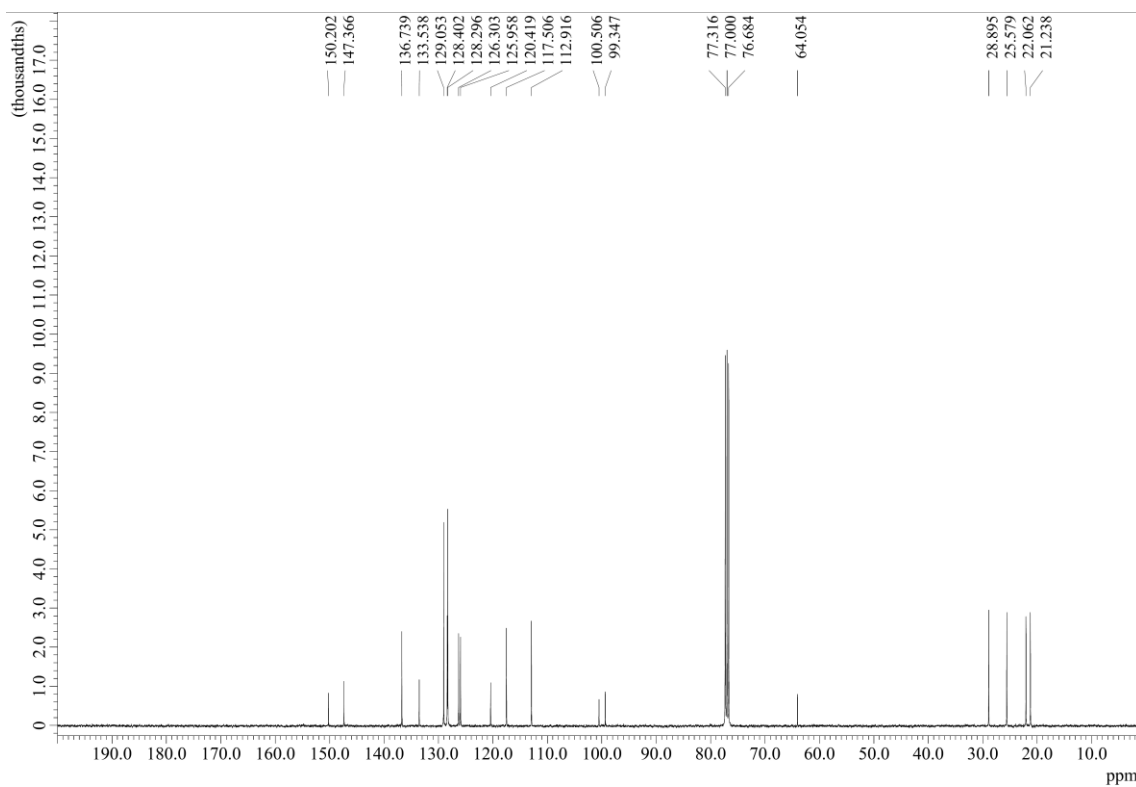

<sup>1</sup>H NMR of **4ah**

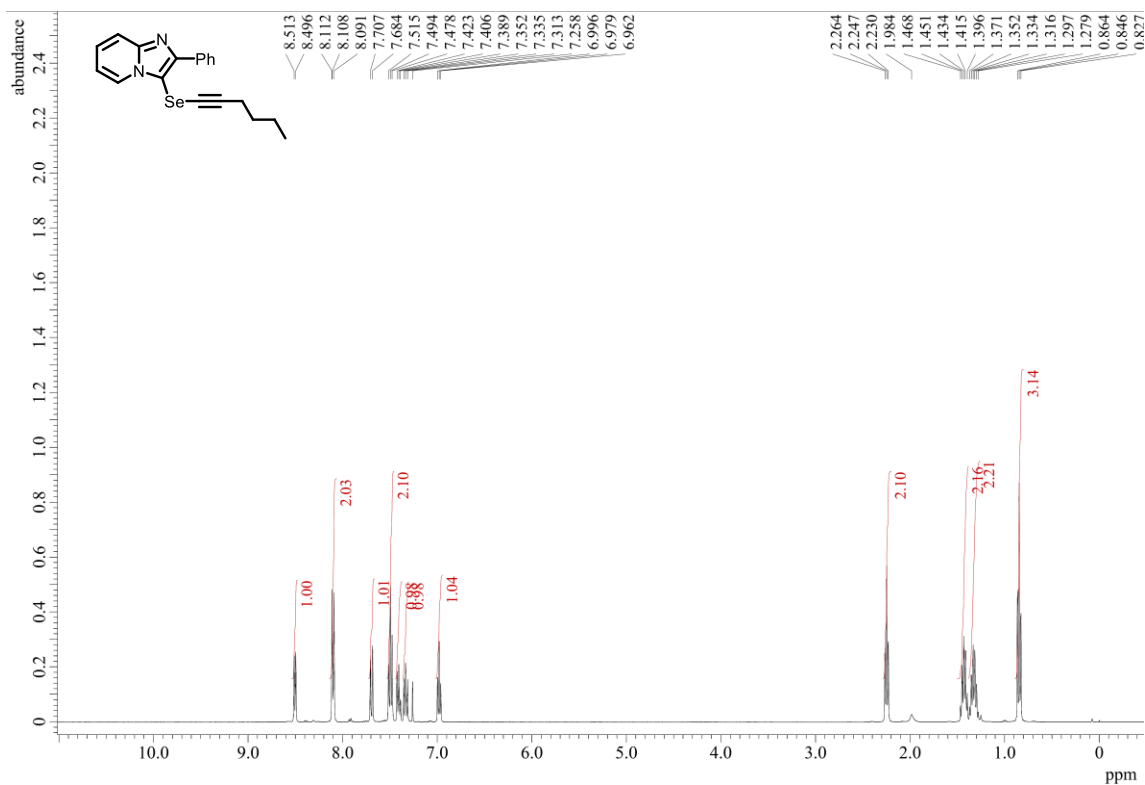

<sup>13</sup>C NMR of **4ah**

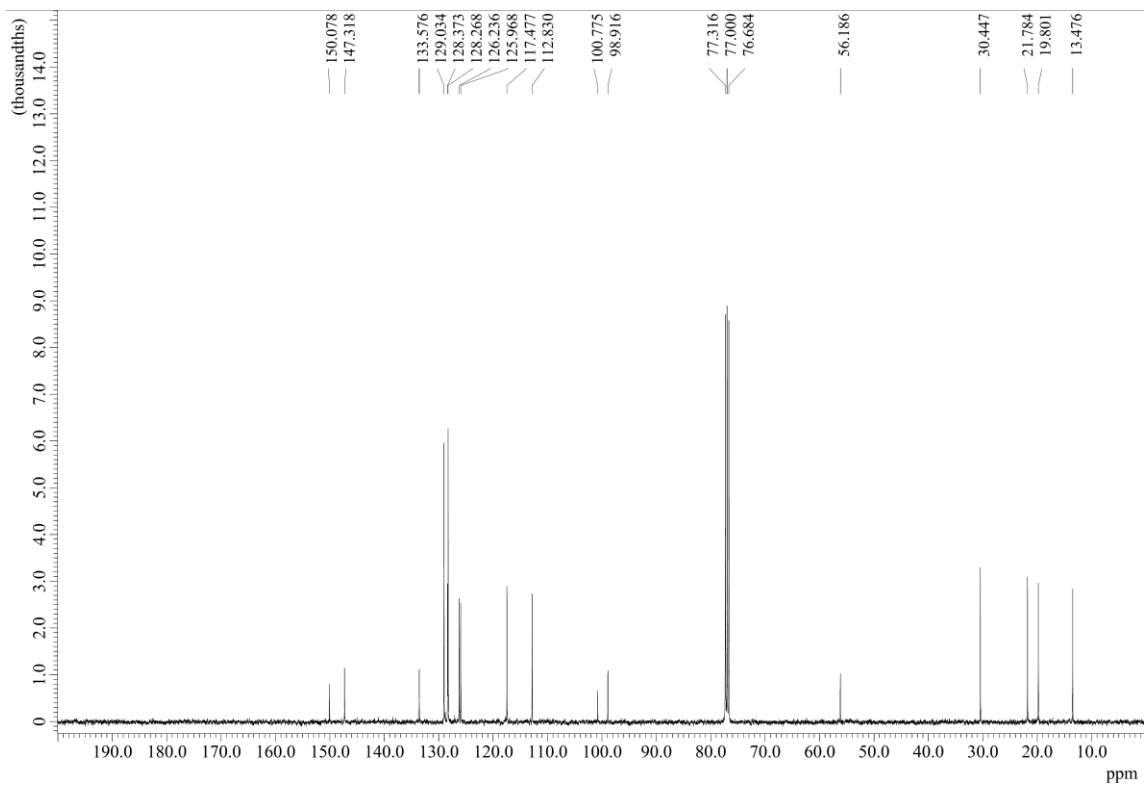

<sup>1</sup>H NMR of **4ba**

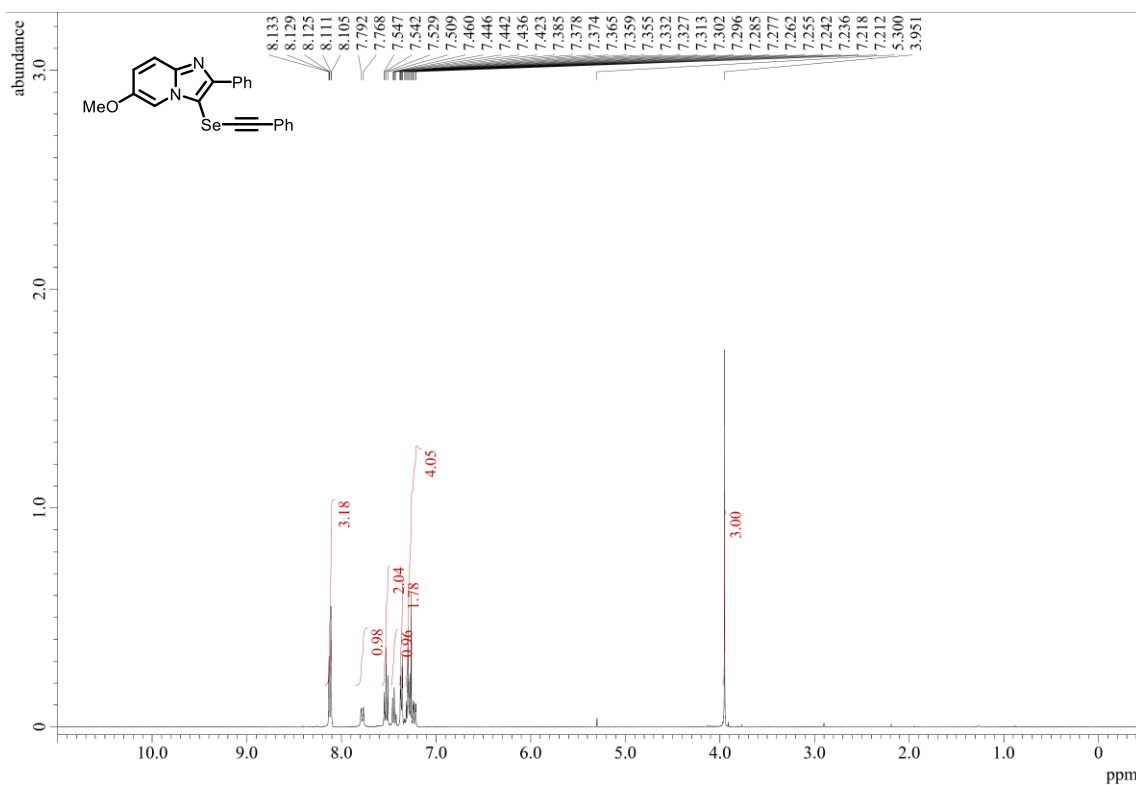

<sup>13</sup>C NMR of **4ba**

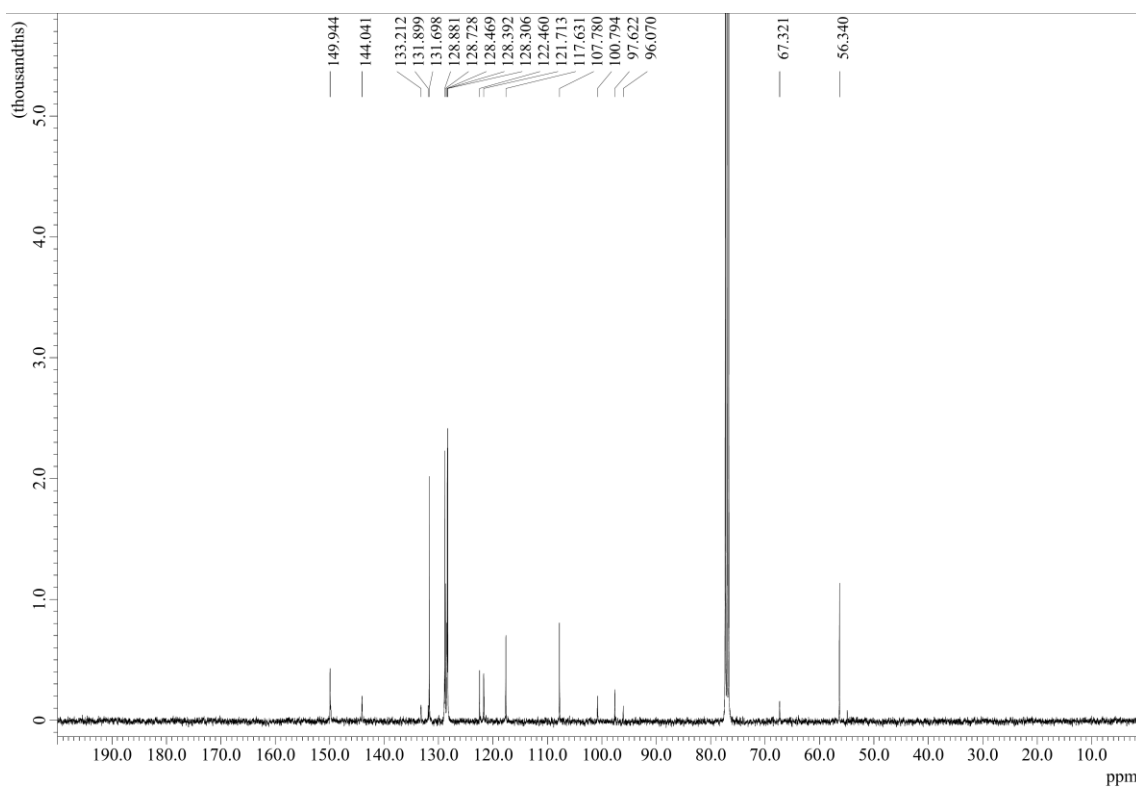

<sup>1</sup>H NMR of **4ca**

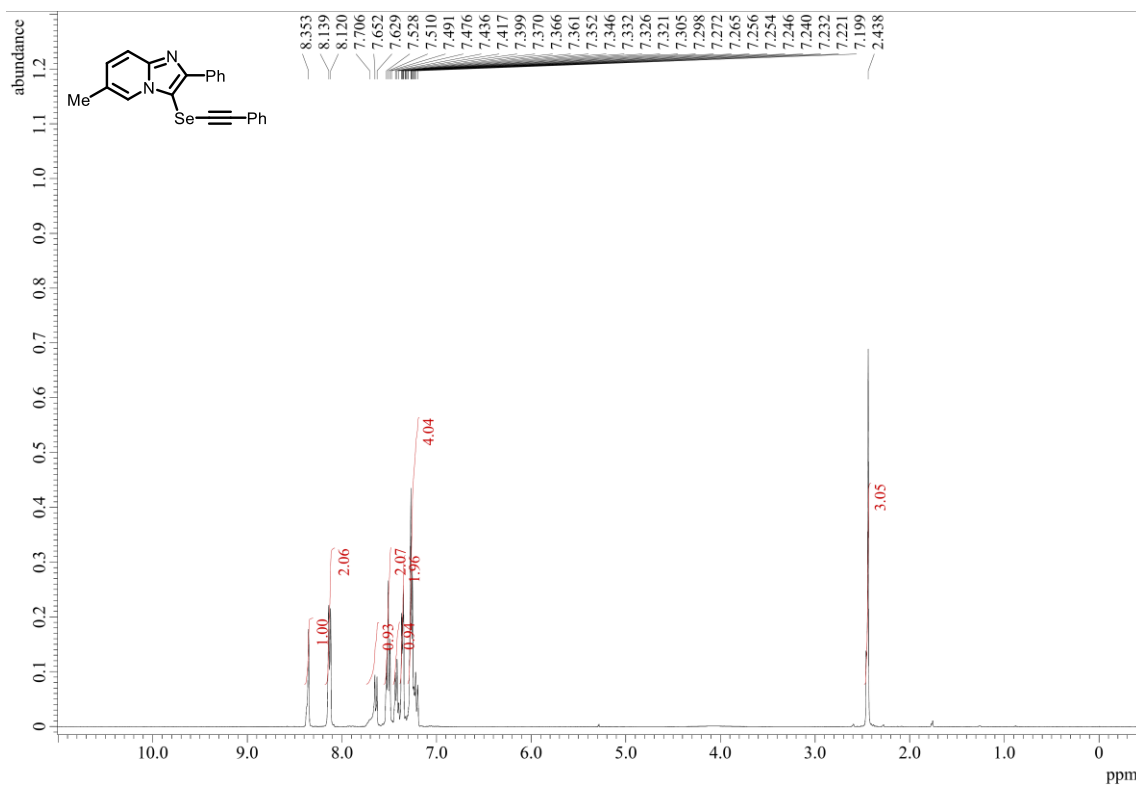

<sup>13</sup>C NMR of **4ca**

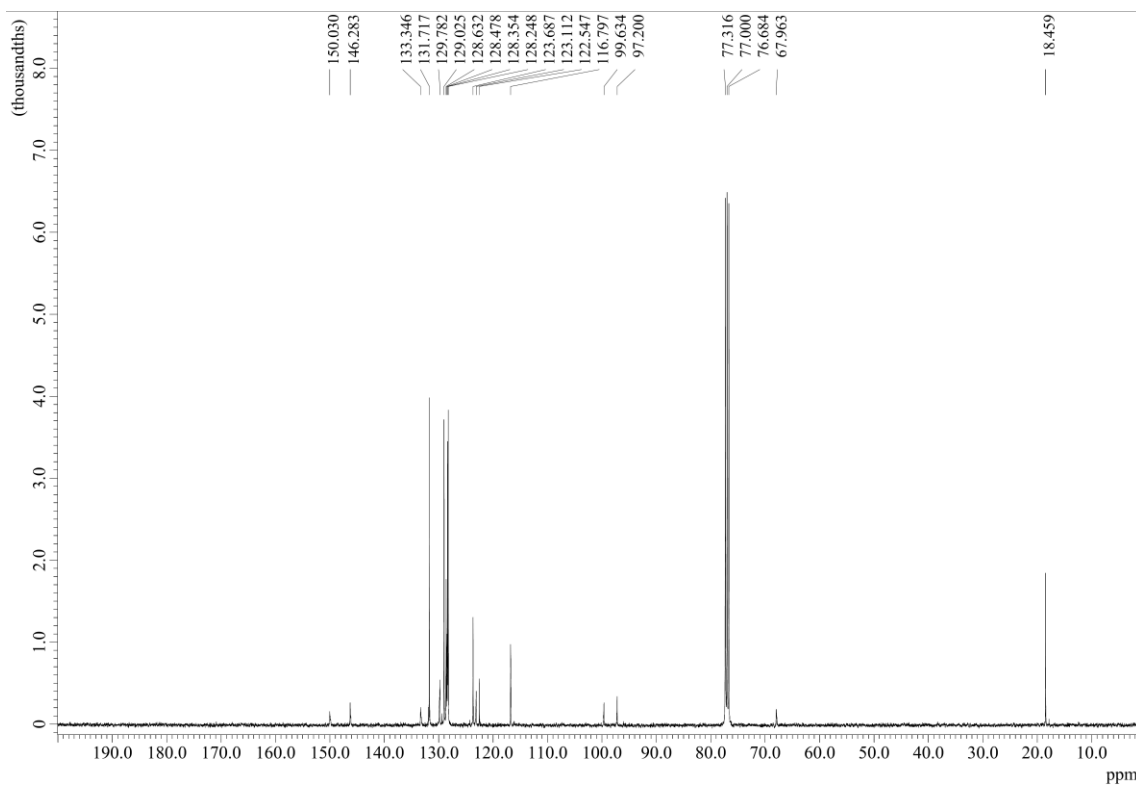

<sup>1</sup>H NMR of **4da**

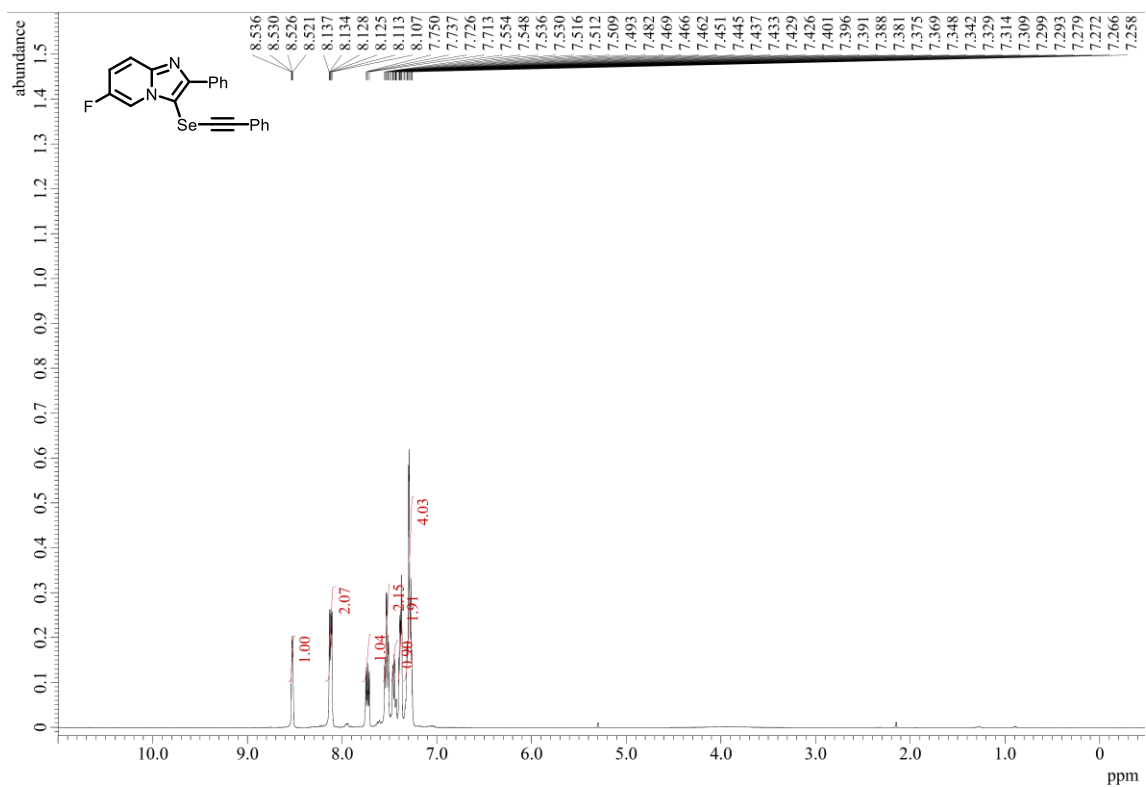

<sup>13</sup>C NMR of **4da**

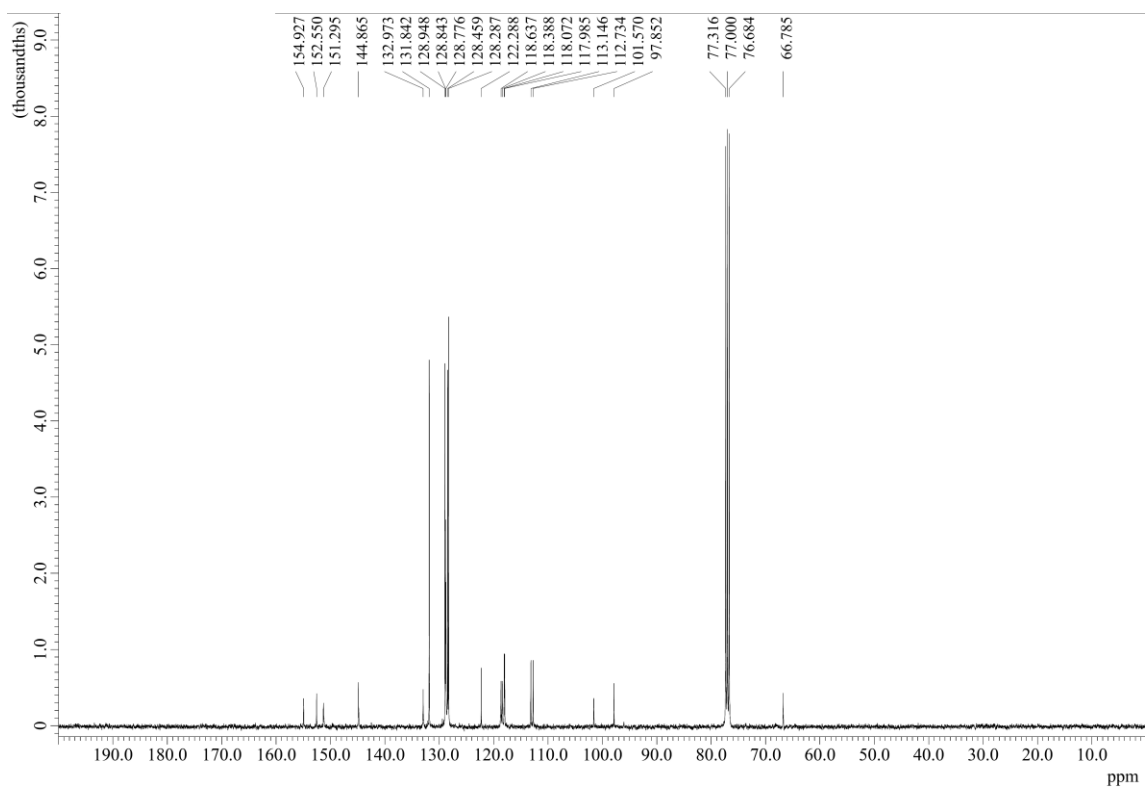



<sup>1</sup>H NMR of **4ea**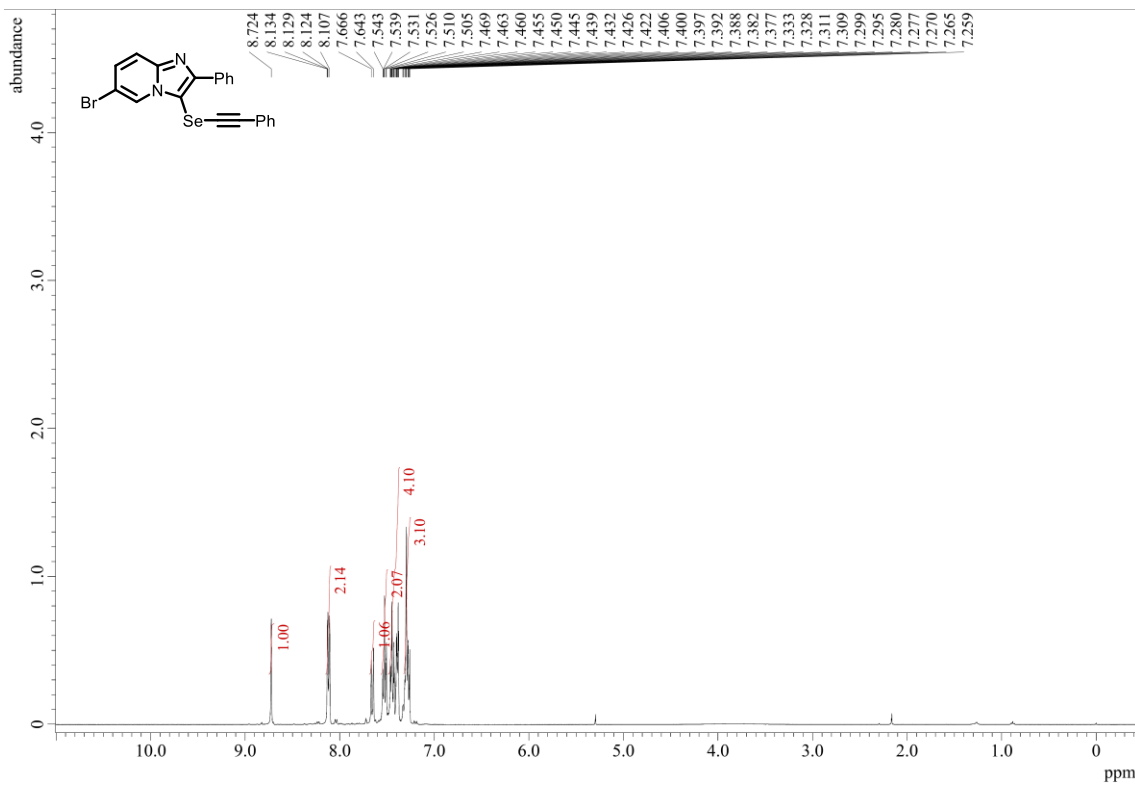 $^{13}\text{C}$  NMR of **4ea**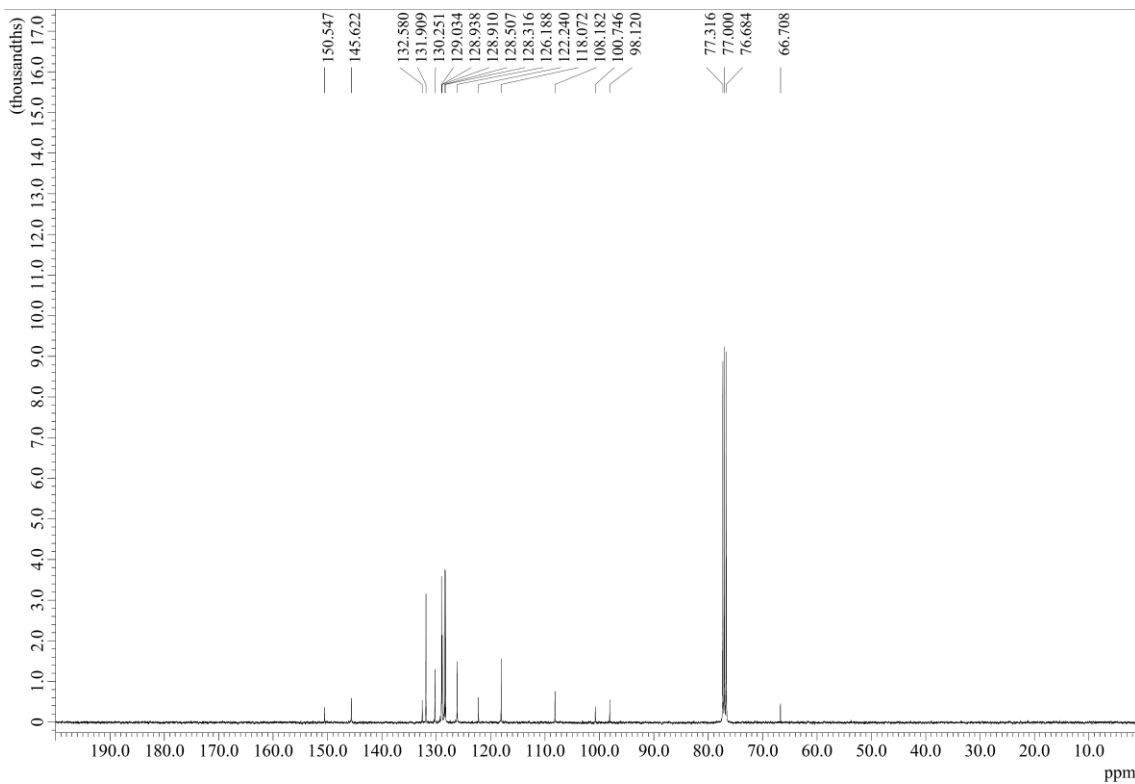

<sup>1</sup>H NMR of **4ga**

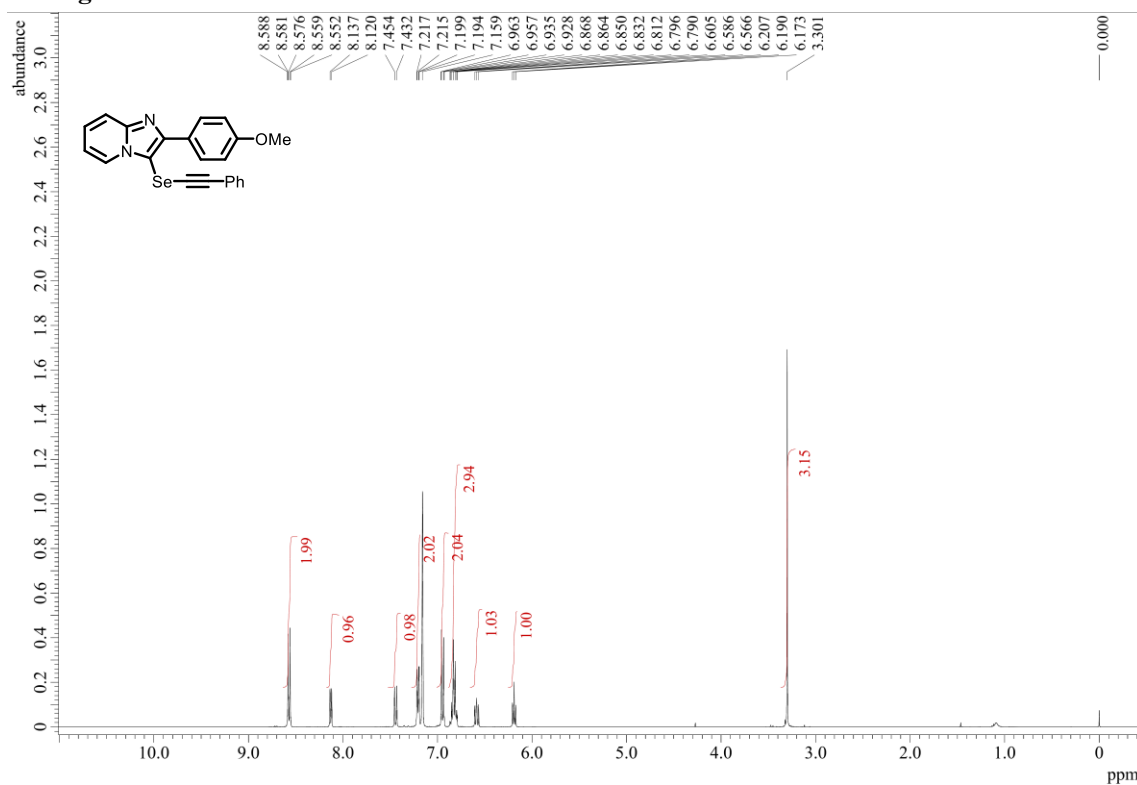

<sup>13</sup>C NMR of **4ga**

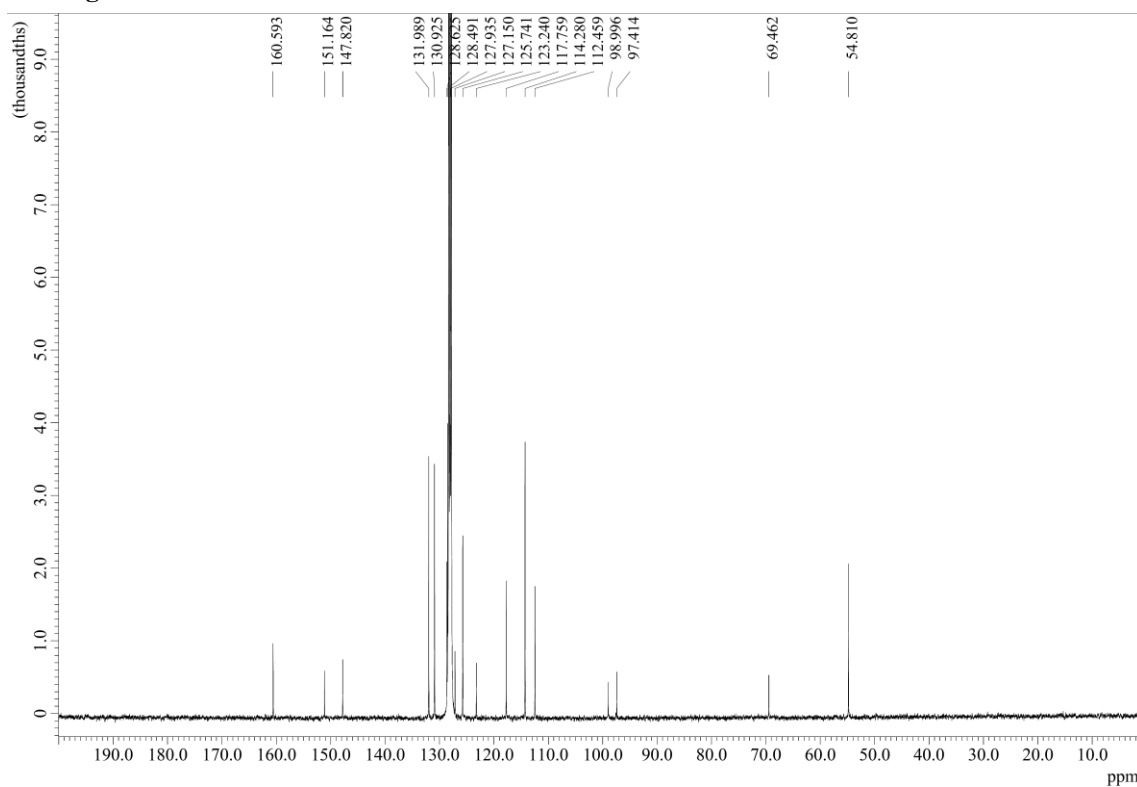

<sup>1</sup>H NMR of **4ha**

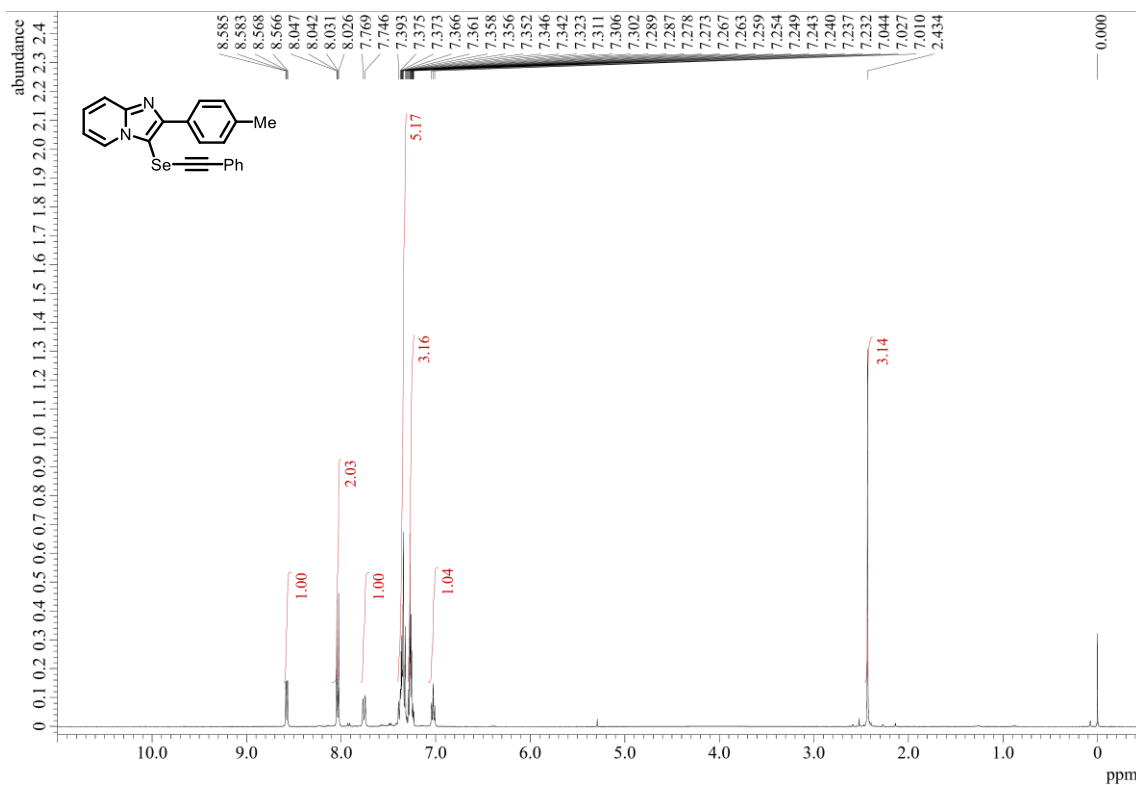

<sup>13</sup>C NMR of **4ha**

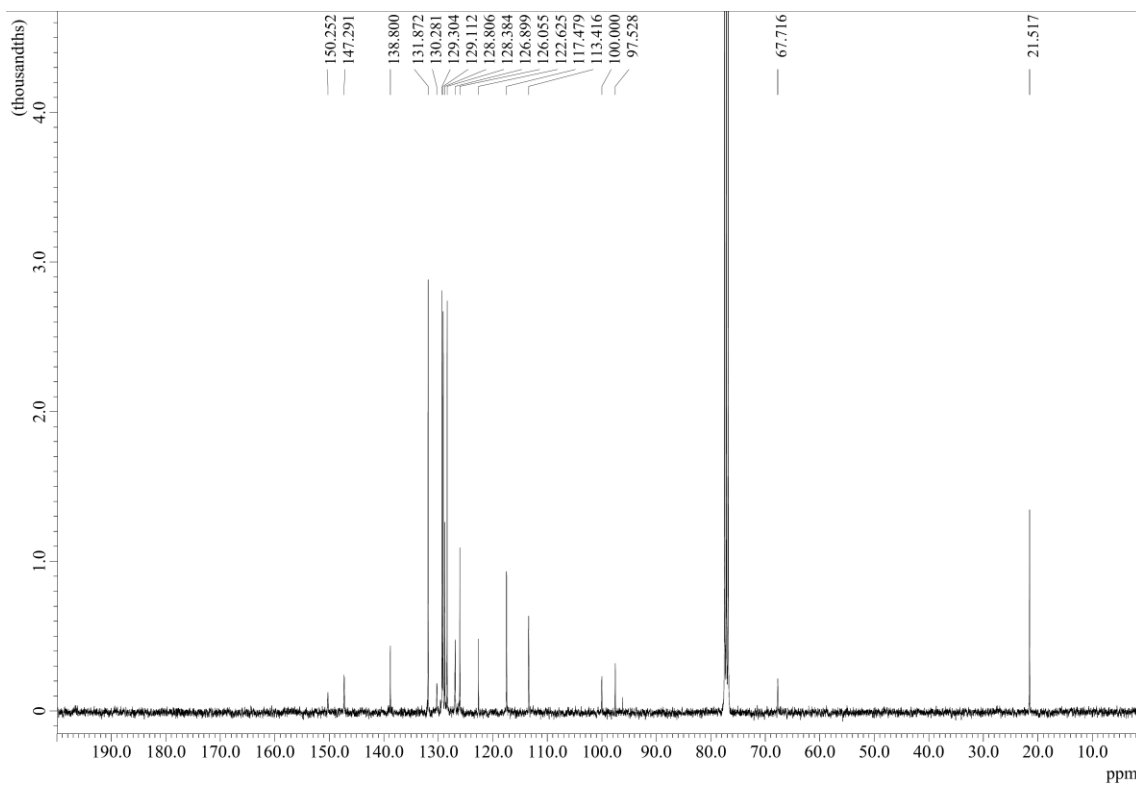

<sup>1</sup>H NMR of **4ia**

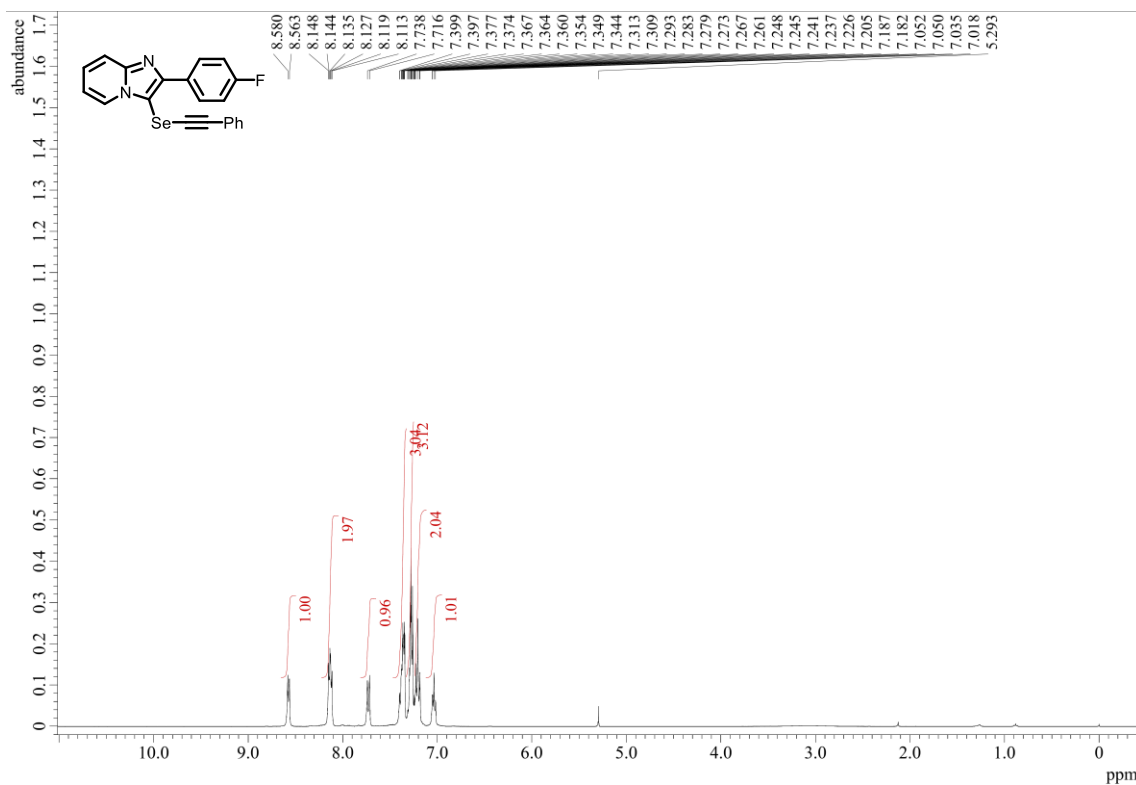

<sup>13</sup>C NMR of **4ia**

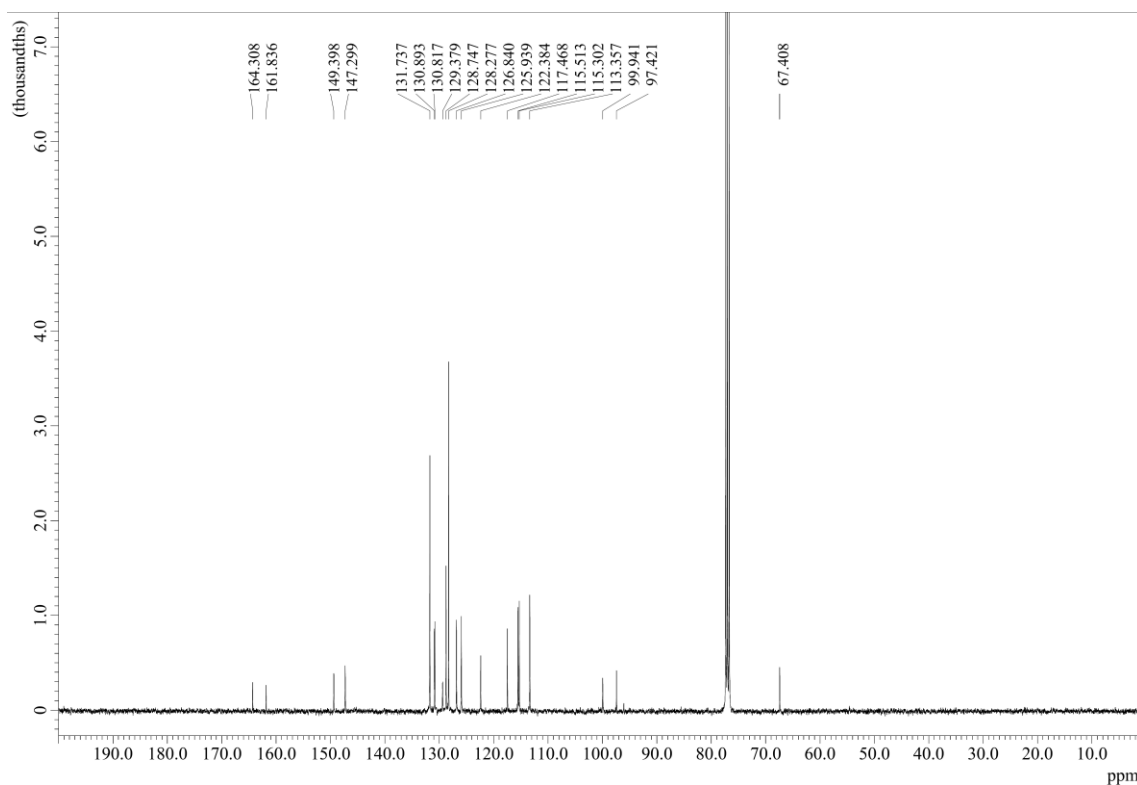

<sup>1</sup>H NMR of **4ja**

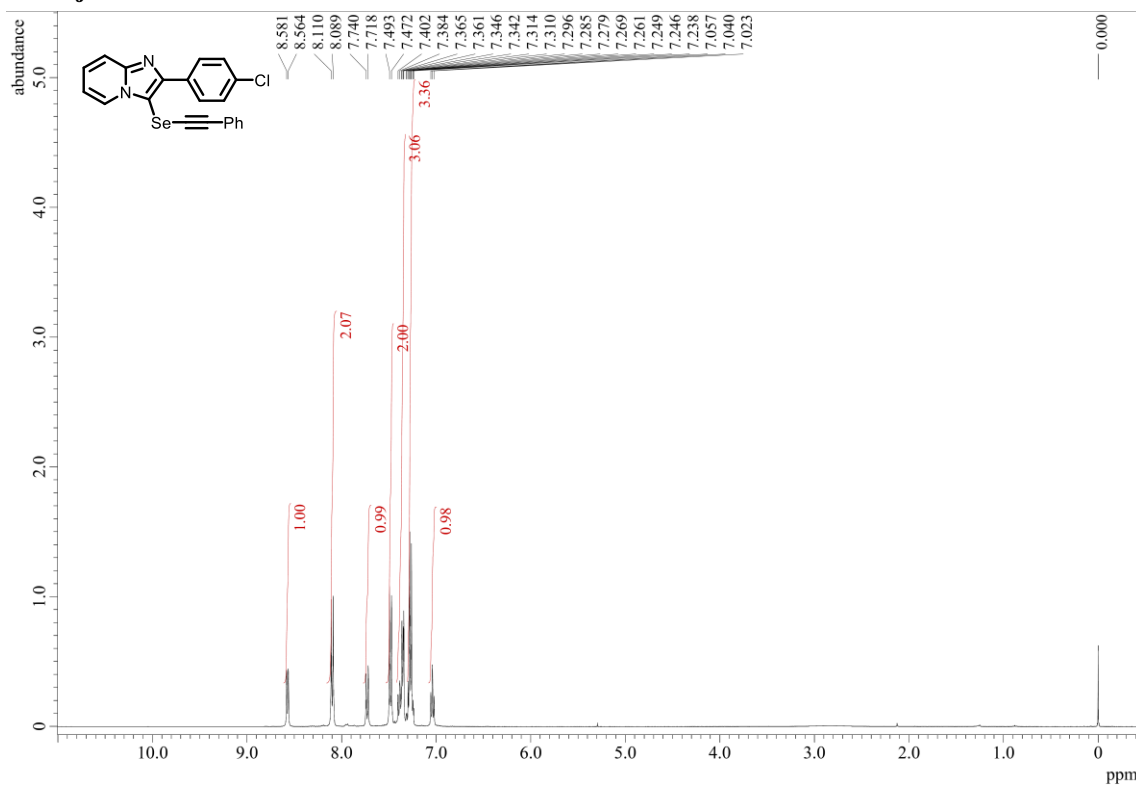

<sup>13</sup>C NMR of **4ja**

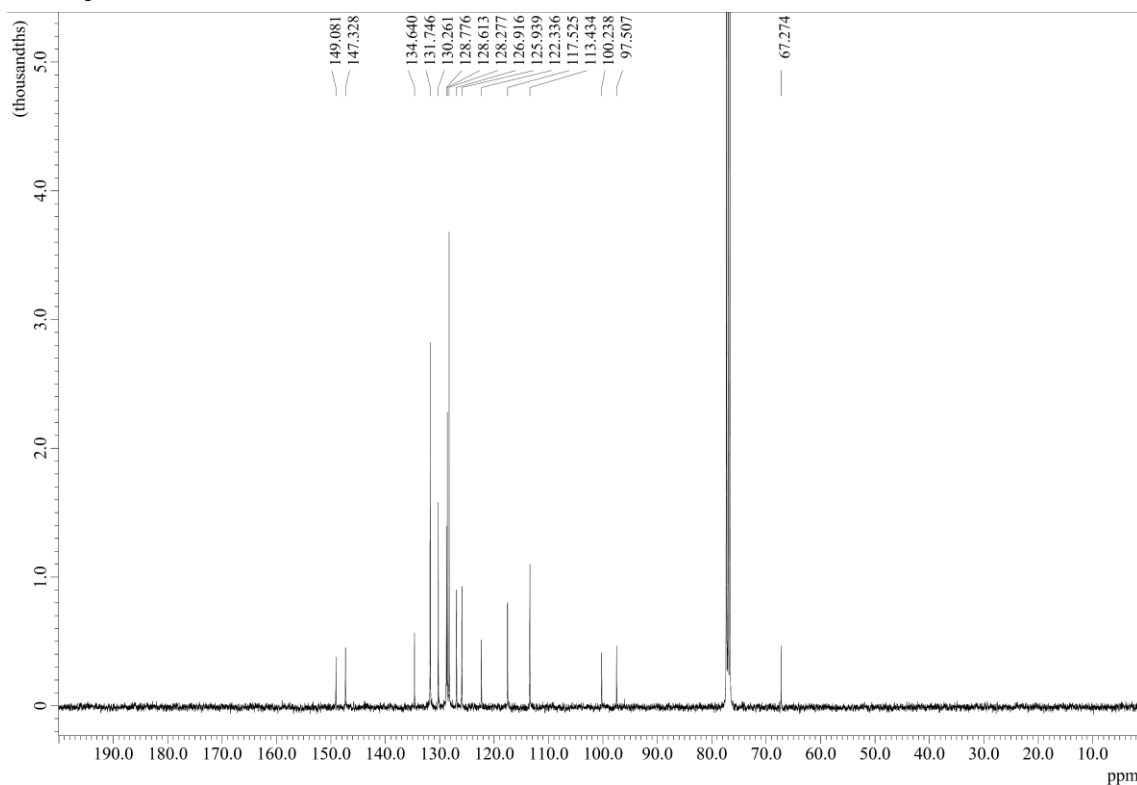

<sup>1</sup>H NMR of **4ka**

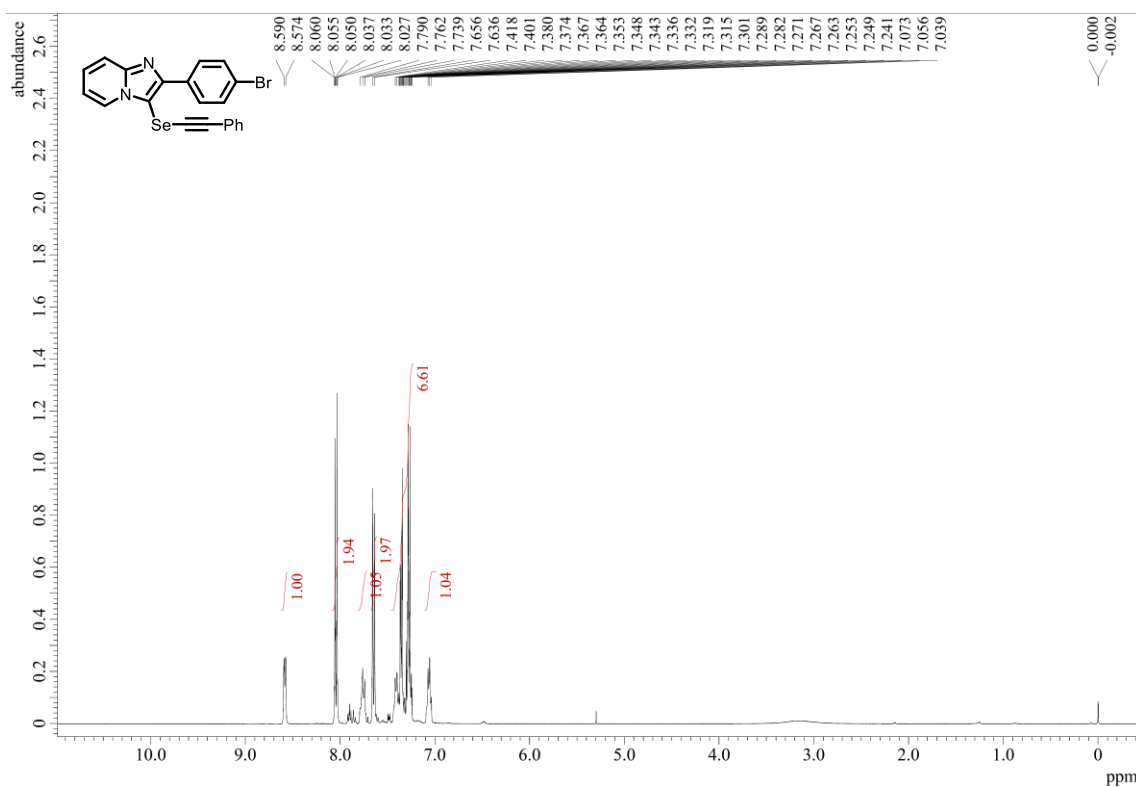

<sup>13</sup>C NMR of **4ka**

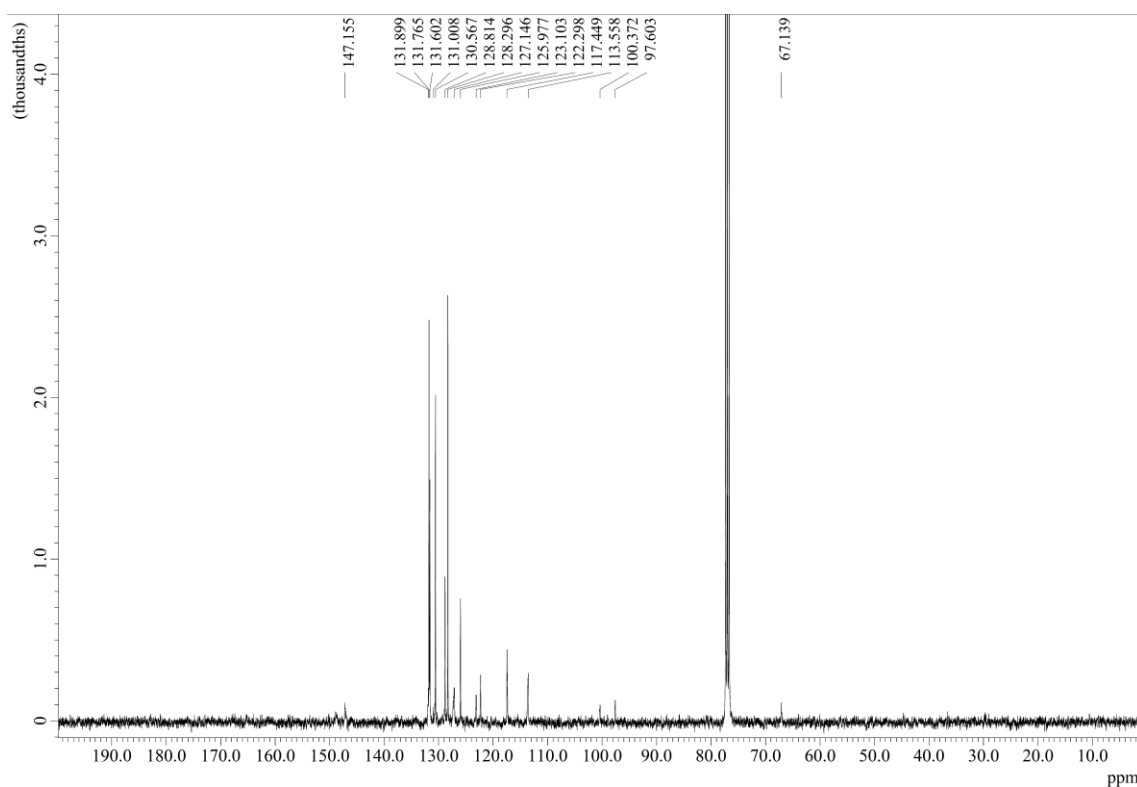

<sup>1</sup>H NMR of **4la**

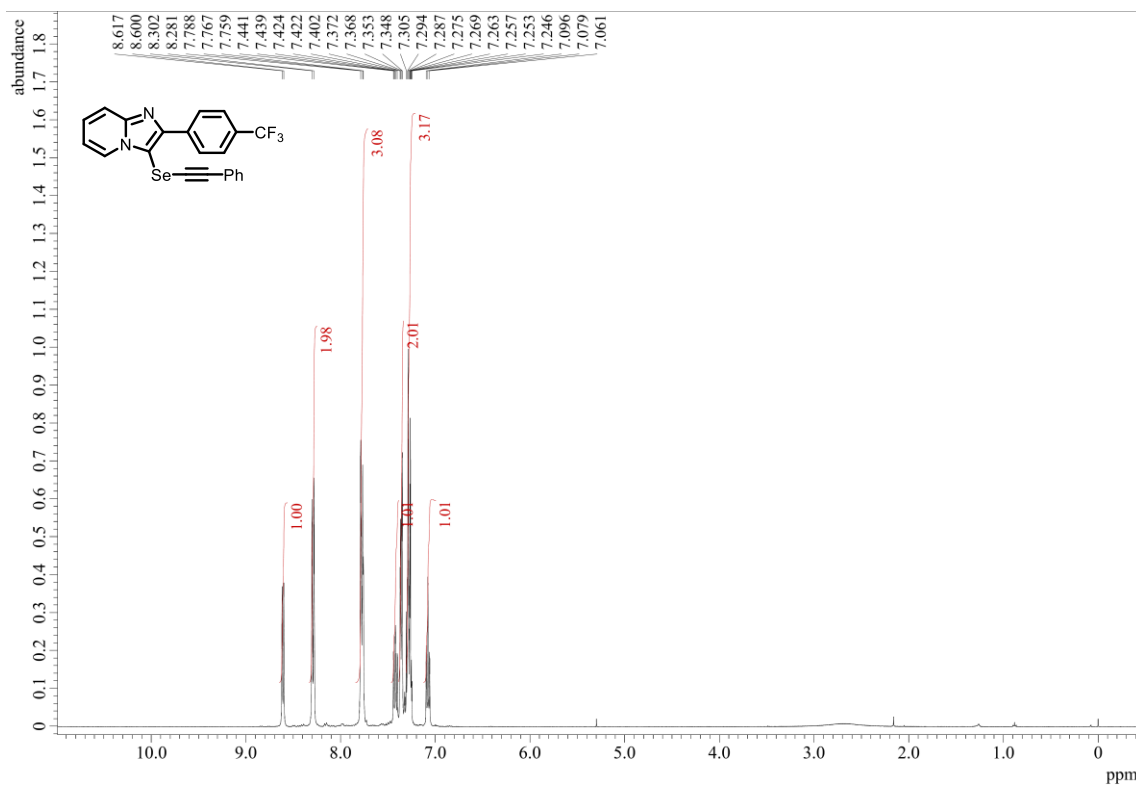

<sup>13</sup>C NMR of **4la**

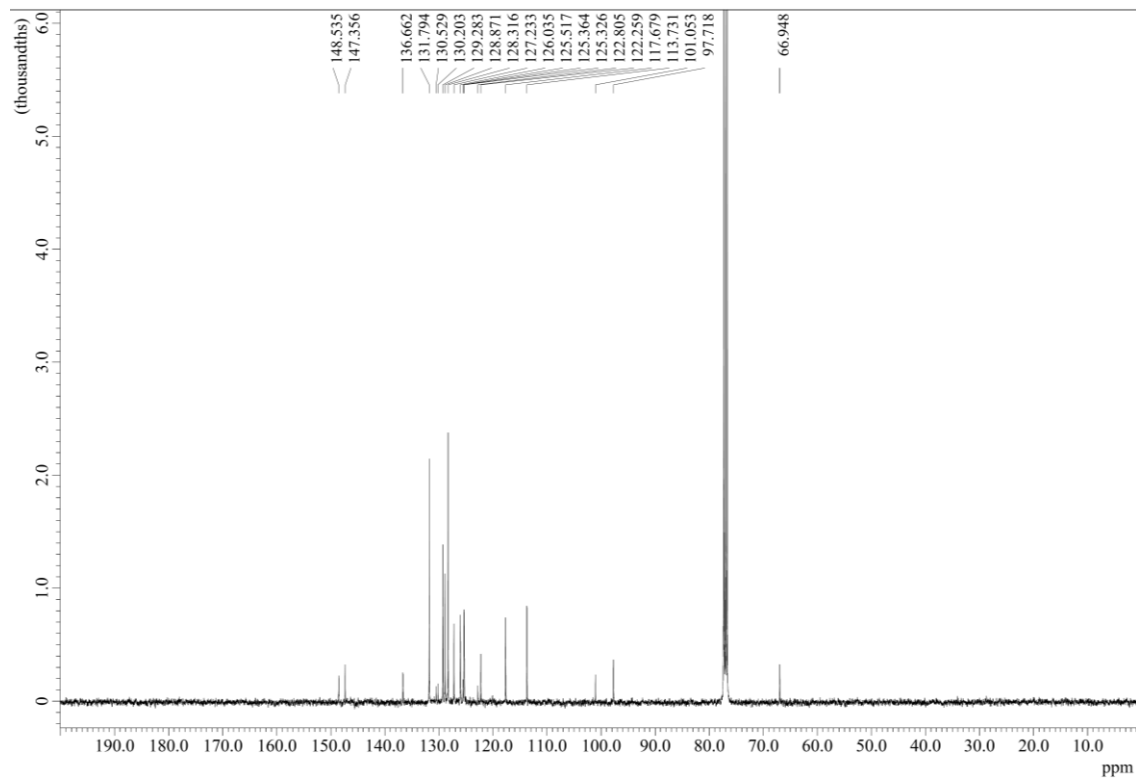

<sup>1</sup>H NMR of **4ma**

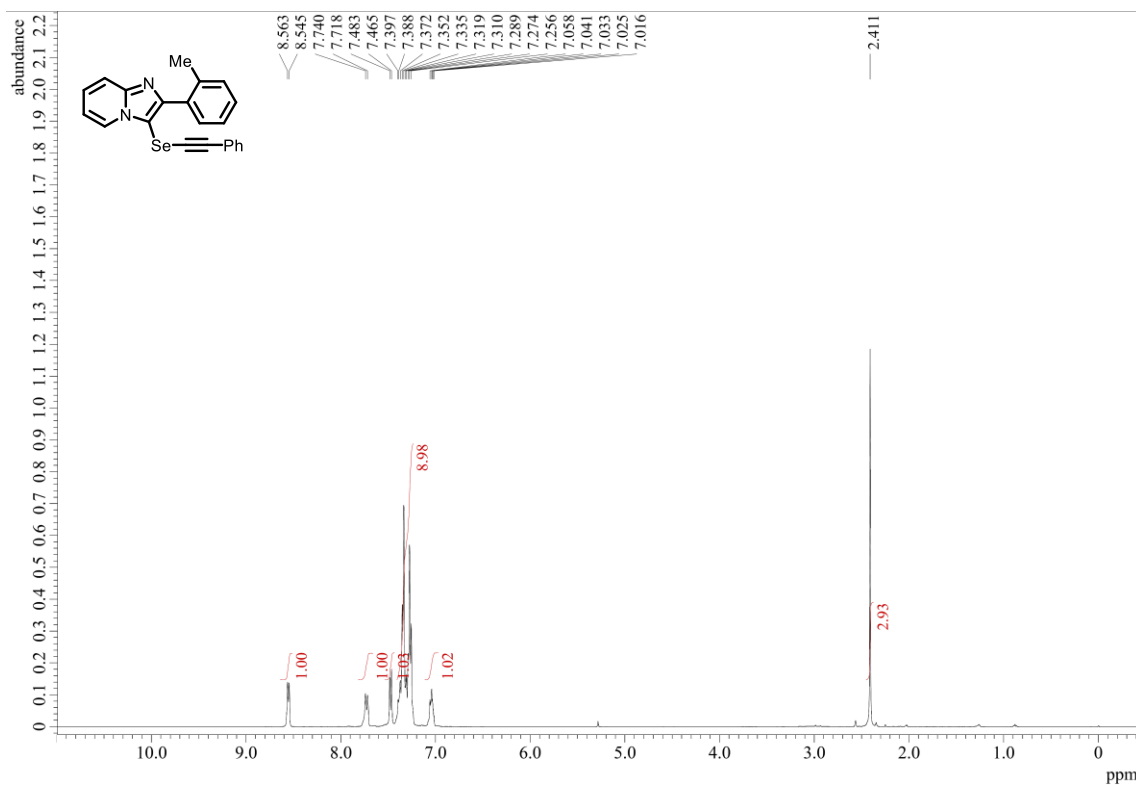

<sup>13</sup>C NMR of **4ma**

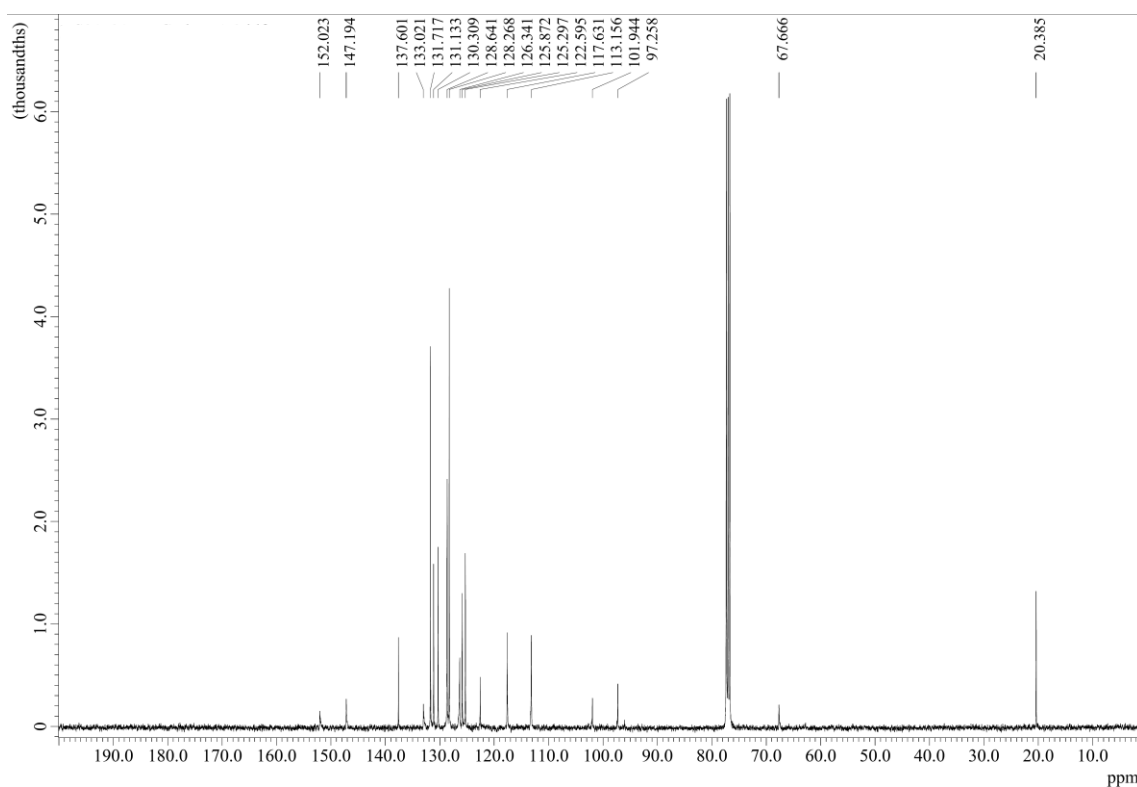



<sup>1</sup>H NMR of **8**

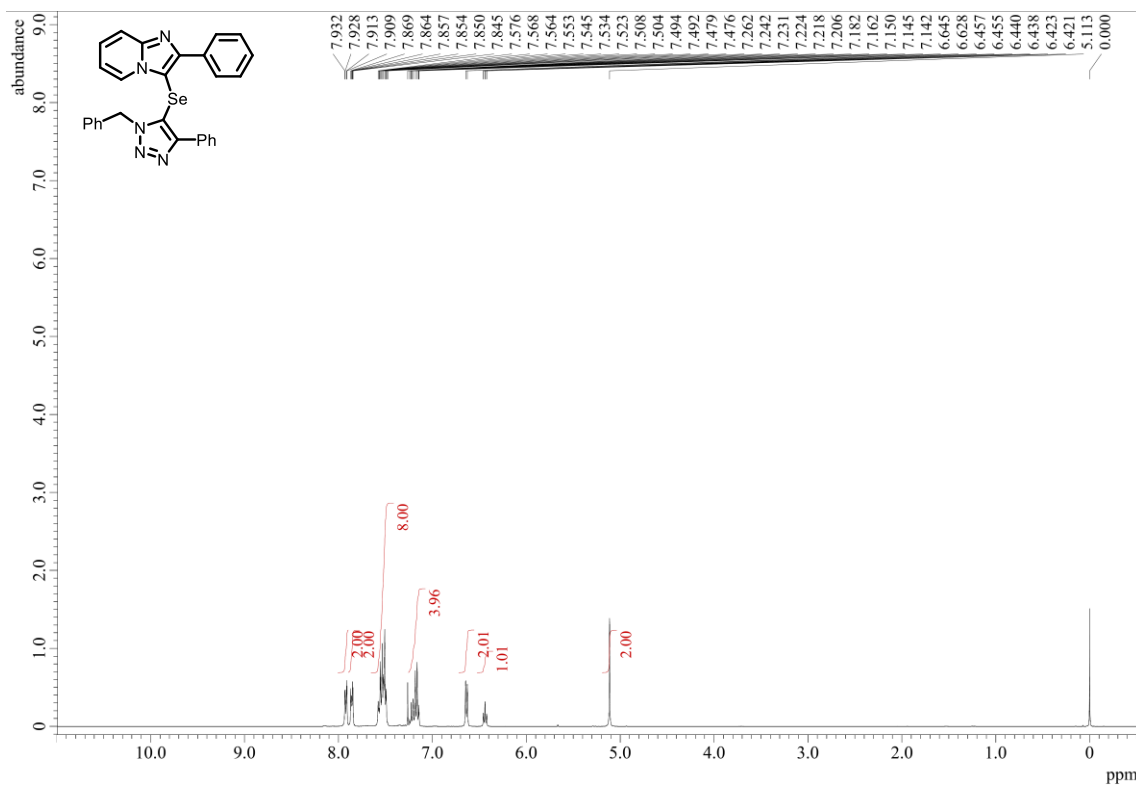

<sup>13</sup>C NMR of **8**

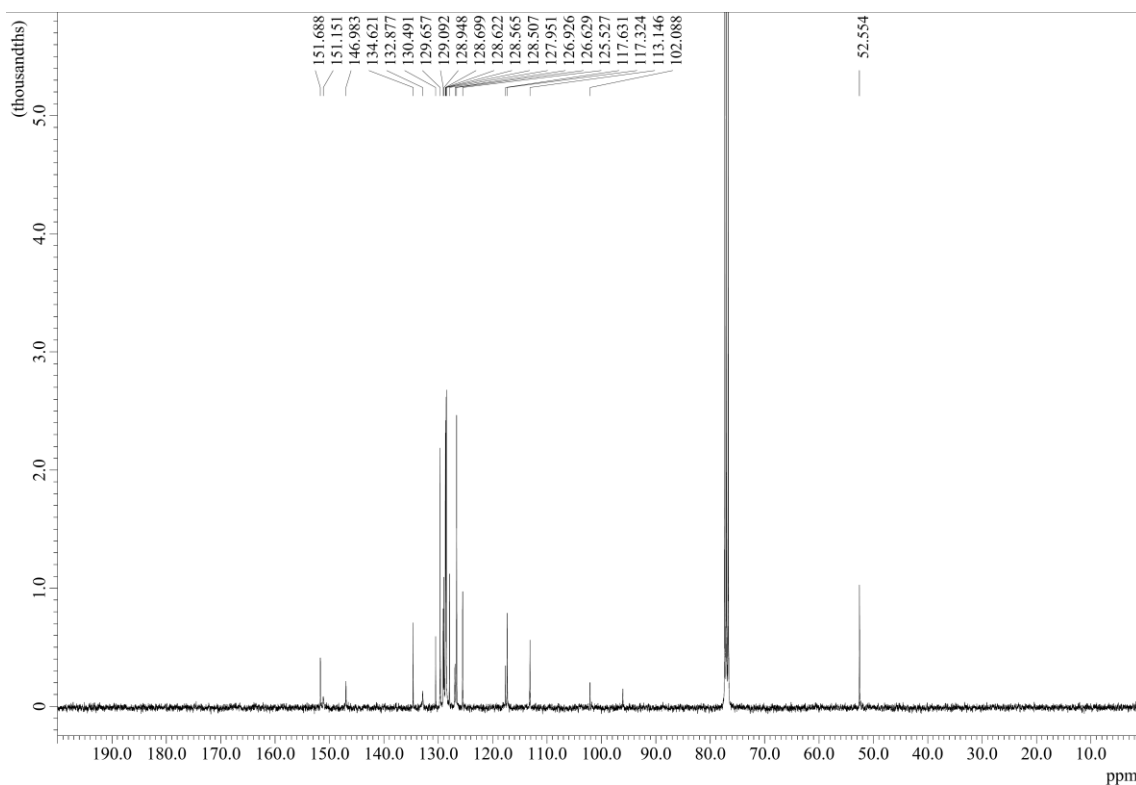

Supplement: Additional file 1 [file 1860-5397-18-87-S1.pdf]
